# Supplementary material for: What makes a mycoparasite? Similarities between fungi that attack other fungi and fungal and oomycete plant pathogens based on structural homology of their candidate effectors
Source: Research Square preprint supplement (doi:10.21203/rs.3.rs-7759314/v1), 2025-10-07
Supplement: Supplementary file 1 [file 9512ea5e4e0055092f7d0241.xlsx]

## Sheet: Supplementary Table 1
Supplementary Table S1. List of 100 species/isolates used in one or more of the analyses and details about them. “Y” means Yes, this isolate was used in a specific analysis, “N” means No. The “(Y)” and “(N)” mean probably Yes or No with uncertainty. “M” equals Maybe. “E” refers to Endophytes, “S” to Saprobes and “T” to isolates possibly producing Toxins.
Kingdom	Division	Subdivision	Class	Order	Family	Species	Isolate	CDS	Orthofinder	CAZymes	Mycoparasite	Animal Pathogen	Plant Pathogen	BioProject	BioSample ID	Genbank Assembly or GCF	Ref#1	Ref#2	Ref#3
Oomycota	-	-	-	Pythiales	Pythiaceae	Pythium insidiosum	Pi-S	Y	N	Y	M	Y	N	PRJDB3817	SAMD00028776	GCA_001029375.2	Gaastra, Wim, et al. "Pythium insidiosum: an overview." Veterinary microbiology 146.1-2 (2010): 1-16.
Fungi	Ascomycota	Pezizomycotina	Sordariomycetes	Hypocreales	Cordycipitaceae	Beauveria brongniartii	RCEF 3172	Y	N	Y	N	Y	N	PRJNA72729	SAMN04908327	GCA_001636735.1	Zimmermann, Gisbert. "Review on safety of the entomopathogenic fungi Beauveria bassiana and Beauveria brongniartii." Biocontrol Science and Technology 17.6 (2007): 553-596.
Fungi	Ascomycota	Pezizomycotina	Dothideomycetes	Pleosporales	Pleosporaceae	Bipolaris maydis	C5	Y	N	Y	N	N	Y	PRJNA42739	SAMN00006316	GCA_000338975.1	Aregbesola, Elizabeth, et al. "A detached leaf assay to rapidly screen for resistance of maize to Bipolaris maydis, the causal agent of southern corn leaf blight." European Journal of Plant Pathology 156 (2020): 133-145.
Fungi	Ascomycota	Pezizomycotina	Sordariomycetes	Hypocreales	Cordycipitaceae	Lecanicillium fungicola	Babe33	Y	N	Y	N	Y	N	PRJNA865064	SAMN30090092	GCA_027595875.1	Berendsen, Roeland L., et al. "Lecanicillium fungicola: causal agent of dry bubble disease in white‐button mushroom." Molecular plant pathology 11.5 (2010): 585-595.
Fungi	Ascomycota	Pezizomycotina	Sordariomycetes	Hypocreales	Cordycipitaceae	Lecanicillium saksenae	VT-O1	Y	N	Y	N	Y	N	PRJNA855341	SAMN29489342	GCA_027627215.1	Sankar, SS Hari, and OP Reji Rani. "Pathogenicity and field efficacy of the entomopathogenic fungus, Lecanicillium saksenae Kushwaha, Kurihara and Sukarno in the management of rice bug, Leptocorisa acuta Thunberg." Journal of Biological Control (2018): 230-238.
Fungi	Ascomycota	Pezizomycotina	Sordariomycetes	Hypocreales	Clavicipitaceae	Metarhizium acridum	CQMa 102	Y	N	Y	N	Y	N	PRJNA38715	SAMN02981259	GCA_000187405.1	Faria, Marcos, Ann E. Hajek, and Stephen P. Wraight. "Imbibitional damage in conidia of the entomopathogenic fungi Beauveria bassiana, Metarhizium acridum, and Metarhizium anisopliae." Biological Control 51.3 (2009): 346-354.
Fungi	Ascomycota	Pezizomycotina	Sordariomycetes	Hypocreales	Clavicipitaceae	Metarhizium album	ARSEF 1941	Y	N	Y	N	Y	N	PRJNA72731	SAMN03268435	GCA_000804445.1	Sun, Hui-Hui, Yong-Jie Zhang, and Shu Zhang. "Complete mitogenome of the entomopathogenic fungus Metarhizium album and phylogenetic analysis of Hypocreales." Mitochondrial DNA Part B 6.6 (2021): 1689-1690.
Fungi	Ascomycota	Pezizomycotina	Sordariomycetes	Hypocreales	Clavicipitaceae	Metarhizium robertsii	ARSEF 23	Y	N	Y	N	Y	N	PRJNA38717	SAMN02981260	GCA_000187425.2	Sasan, Ramanpreet K., and Michael J. Bidochka. "The insect‐pathogenic fungus Metarhizium robertsii (Clavicipitaceae) is also an endophyte that stimulates plant root development." American journal of botany 99.1 (2012): 101-107.
Fungi	Ascomycota	-	Eurotiomycetes	Eurotiales	Aspergillaceae	Penicillium arizonense	CBS141311C	Y	N	Y	N	N	N	PRJNA318735	SAMN04884538	GCA_001773325.1	Grijseels, S., Nielsen, J. C., Randelovic, M., Nielsen, J., Nielsen, K. F., Workman, M., & Frisvad, J. C. (2016). Penicillium arizonense, a new, genome sequenced fungal species, reveals a high chemical diversity in secreted metabolites. Scientific Reports, 6(1), 35112.
Fungi	Ascomycota	Pezizomycotina	Dothideomycetes	Pleosporales	Leptosphaeriaceae	Plenodomus lindquistii	US01	Y	N	Y	N	N	Y	PRJNA872321	SAMN30451223	GCA_025504975.1	Lei, Rong, et al. "Nanopore/Illumina Hybrid Whole-Genome Sequence Resource of Plenodomus lindquistii Strain US01 Infecting Sunflower." Plant Disease (2023): PDIS-09.
Fungi	Zoopagomycota	Kickxellomycotina	Kickxellomycetes	Kickxellales	Kickxellaceae	Kickxella alabastrina	RSA 675	Y	N	Y	N	N	N	PRJNA364354	SAMN06264465	GCA_025024165.1	Tretter, E. D., Johnson, E. M., Benny, G. L., Lichtwardt, R. W., Wang, Y., Kandel, P., ... & White, M. M. (2014). An eight-gene molecular phylogeny of the Kickxellomycotina, including the first phylogenetic placement of Asellariales. Mycologia, 106(5), 912-935.
Fungi	Ascomycota	Pezizomycotina	Orbiliomycetes	Orbiliales	Orbiliaceae	Arthrobotrys flagrans	CBS H-5679	Y	Y	Y	(N)	Y	N	PRJNA494930	SAMN10185917	GCA_004000055.1	Wang, Bo‐bo, et al. "Microstructure characterization of different types of chlamydospores in Arthrobotrys flagrans." Journal of Basic Microbiology (2023).
Fungi	Ascomycota	Pezizomycotina	Sordariomycetes	Hypocreales	Cordycipitaceae	Cordyceps fumosorosea	ARSEF 2679	Y	Y	Y	(N)	Y	N	PRJNA72737	SAMN04908328	GCA_001636725.1	Corrêa, Bianca, et al. "Comparative analysis of blastospore production and virulence of Beauveria bassiana and Cordyceps fumosorosea against soybean pests." BioControl 65.3 (2020): 323-337.
Fungi	Ascomycota	Pezizomycotina	Sordariomycetes	Hypocreales	Cordycipitaceae	Cordyceps javanica	IJ1G	Y	Y	Y	(N)	Y	N	PRJNA528795	SAMN11244955	GCA_006981985.1	Ou, Da, et al. "Identification of a new Cordyceps javanica fungus isolate and its toxicity evaluation against Asian citrus psyllid." Microbiologyopen 8.6 (2019): e00760.
Fungi	Ascomycota	Pezizomycotina	Sordariomycetes	Hypocreales	Cordycipitaceae	Cordyceps militaris	CM01	Y	Y	Y	(N)	Y	N	PRJNA41129	SAMN02981304	GCA_000225605.1	Nguyen, Trung Thanh, Thi Nguyen-Gia Le, and Thuan Huy Nguyen. "First report of emerging fungal pathogens of Cordyceps militaris in Vietnam." Scientific Reports 13.1 (2023): 17669.
Fungi	Ascomycota	Pezizomycotina	Dothideomycetes	Pleosporales	Phaeosphaeriaceae	Ophiobolus disseminans	CBS 113818	Y	Y	Y	(N)	N	N	PRJNA239491	SAMN02744844	GCA_010093685.1	Phookamsak, Rungtiwa, et al. "Towards a natural classification of Ophiobolus and ophiobolus-like taxa; introducing three novel genera Ophiobolopsis, Paraophiobolus and Pseudoophiobolus in Phaeosphaeriaceae (Pleosporales)." Fungal Diversity 87.1 (2017): 299-339.
Fungi	Ascomycota	Pezizomycotina	Sordariomycetes	Hypocreales	Ophiocordycipitaceae	Ophiocordyceps sinensis	IOZ07	Y	Y	Y	(N)	Y	Y	PRJNA608258	SAMN14168421	GCA_012934285.1	Shrestha, Bhushan, et al. "What is the Chinese caterpillar fungus Ophiocordyceps sinensis (Ophiocordycipitaceae)?." Mycology 1.4 (2010): 228-236.	Tong, Xinxin, and Jinlin Guo. "High throughput identification of the potential antioxidant peptides in Ophiocordyceps sinensis." Molecules 27.2 (2022): 438.	Lei, Wei, et al. "Development of Ophiocordyceps sinensis through plant-mediated interkingdom host colonization." International journal of molecular sciences 16.8 (2015): 17482-17493.
Fungi	Ascomycota	Pezizomycotina	Sordariomycetes	Hypocreales	Stachybotryaceae	Stachybotrys chartarum	IBT 40293	Y	Y	Y	(N)	Y	N	PRJNA185808	SAMN01819008	GCA_000732565.1	Dyląg, Mariusz, et al. "Update on Stachybotrys chartarum—Black mold perceived as toxigenic and potentially pathogenic to humans." Biology 11.3 (2022): 352.
Fungi	Ascomycota	Pezizomycotina	Sordariomycetes	Hypocreales	Stachybotryaceae	Stachybotrys chlorohalonata	IBT 40285	Y	Y	Y	(N)	Y	N	PRJNA185807	SAMN01819006	GCA_000732775.1	Semis, Margarita, et al. "First case of invasive Stachybotrys sinusitis." Clinical Infectious Diseases 72.8 (2021): 1386-1391.
Fungi	Ascomycota	Pezizomycotina	Sordariomycetes	Hypocreales	Hypocreaceae	Trichoderma aggressivum f europaeum	CBS 100526	Y	Y	Y	(N)	N	N	PRJNA1034581	SAMN38060657	GCA_033847375.1	O'Brien, M., Grogan, H., & Kavanagh, K. (2014). Proteomic response of Trichoderma aggressivum f. europaeum to Agaricus bisporus tissue and mushroom compost. Fungal biology, 118(9-10), 785-791.
Fungi	Ascomycota	Pezizomycotina	Sordariomycetes	Glomerellales	Plectosphaerellaceae	Verticillium nonalfalfae	VnAa140 / NRRL 66861	Y	Y	Y	(N)	N	Y	PRJNA493511	SAMN10135221	GCA_003724135.2	Rebbeck, Joanne, et al. "First report of Verticillium wilt caused by Verticillium nonalfalfae on tree-of-heaven (Ailanthus altissima) in Ohio." Plant disease 97.7 (2013): 999-999.
Fungi	Basidiomycota	Agaricomycotina	Tremellomycetes	Tremellales	Cryptococcaceae	Cryptococcus neoformans var neoformans	JEC21	Y	Y	Y	(N)	Y	N	PRJNA13856	SAMN03081418	GCA_000091045.1	Fraser, J. A., Huang, J. C., Pukkila-Worley, R., Alspaugh, J. A., Mitchell, T. G., & Heitman, J. (2005). Chromosomal translocation and segmental duplication in Cryptococcus neoformans. Eukaryotic cell, 4(2), 401-406.
Fungi	Mucoromycota	-	Mucoromycetes	Mucorales	Mucoraceae	Mucor mucedo	NRRL 3635	Y	Y	Y	(N)	(N)	(Y)	PRJNA519267	SAMN10864749	GCA_025094135.1	Wetzel, J., Burmester, A., Kolbe, M., & Wöstemeyer, J. (2012). The mating-related loci sexM and sexP of the zygomycetous fungus Mucor mucedo and their transcriptional regulation by trisporoid pheromones. Microbiology, 158(4), 1016-1023.
Fungi	Mucoromycota	-	Mucoromycetes	Mucorales	Mucoraceae	Mucor velutinosus	NIH1002	Y	Y	Y	(N)	(Y)	N	PRJNA302998	SAMN04287070	GCA_035048745.1	Conlan, S., Subramanian, P., Plata Barril, B., Youn, J. H., Thomas, P. J., Koren, S., ... & Zelazny, A. M. (2024). Whole-genome sequence of Mucor velutinosus NIH1002, a strain associated with disseminated disease. Microbiology Resource Announcements, e00062-24.
Fungi	Ascomycota	Pezizomycotina	Dothideomycetes	Cladosporiales	Cladosporiaceae	Cladosporium sp.	JES_115	Y	Y	Y	(Y)	-	-	PRJNA631111	SAMN14852390	GCA_030247845.1	-
Oomycota	-	-	-	Peronosporales	Peronosporaceae	Phytophthora infestans	1306	Y	Y	Y	N	N	Y	PRJNA868814	SAMN30543006	GCA_026225685.1	Matson, M. E., Liang, Q., Lonardi, S., & Judelson, H. S. (2022). Karyotype variation, spontaneous genome rearrangements affecting chemical insensitivity, and expression level polymorphisms in the plant pathogen Phytophthora infestans revealed using its first chromosome-scale assembly. PLoS Pathogens, 18(10), e1010869.
Fungi	Ascomycota	Pezizomycotina	Dothideomycetes	Pleosporales	Pleosporaceae	Alternaria atra	CS162	Y	Y	Y	N	N	Y	PRJEB42493	SAMEA7819814	GCF_907166805.1	Bonthala, Bhawna, et al. "ONT-based draft genome assembly and annotation of Alternaria atra." Molecular Plant-Microbe Interactions 34.7 (2021): 870-873.
Fungi	Ascomycota	-	Eurotiomycetes	Eurotiales	Aspergillaceae	Aspergillus flavus	NRRL3357	Y	Y	Y	N	(N)	(Y)	PRJNA606291	SAMN14089210	GCA_014117465.1	Skerker, J. M., Pianalto, K. M., Mondo, S. J., Yang, K., Arkin, A. P., Keller, N. P., ... & Glass, N. L. (2021). Chromosome assembled and annotated genome sequence of Aspergillus flavus NRRL 3357. G3, 11(8), jkab213.
Fungi	Ascomycota	-	Eurotiomycetes	Eurotiales	Aspergillaceae	Aspergillus niger	CBS 101883	Y	Y	Y	N	(Y)	(Y)	PRJNA235063	SAMN05660348	GCA_003184595.1	Bai, F., Cai, C., Zhang, T., Wang, P., Shi, L., Zhai, L., ... & Yao, S. (2022). Genome-Based Analysis of Aspergillus niger Aggregate Species from China and Their Potential for Fumonisin B2 and Ochratoxin A Production. Current Microbiology, 79(7), 193.
Fungi	Ascomycota	Pezizomycotina	Sordariomycetes	Hypocreales	Cordycipitaceae	Beauveria bassiana	ARSEF 2860	Y	Y	Y	N	Y	N	PRJNA38719	SAMN02981247	GCA_000280675.1	Zimmermann, Gisbert. "Review on safety of the entomopathogenic fungi Beauveria bassiana and Beauveria brongniartii." Biocontrol Science and Technology 17.6 (2007): 553-596.
Fungi	Ascomycota	Pezizomycotina	Dothideomycetes	Pleosporales	Pleosporaceae	Bipolaris sorokiniana	ND90Pr	Y	Y	Y	N	N	Y	PRJNA53923	SAMN02981285	GCF_000338995.1	Al-Sadi, Abdullah M. "Bipolaris sorokiniana-induced black point, common root rot, and spot blotch diseases of wheat: A review." Frontiers in cellular and infection microbiology 11 (2021): 584899.
Fungi	Ascomycota	-	Leotiomycetes	Erysiphales	Erysiphaceae	Blumeria graminis f.sp. triticale	THUN12	Y	Y	Y	N	N	Y	PRJEB40658	SAMEA7375779	GCA_905067625.1	Müller, M. C., Kunz, L., Graf, J., Schudel, S., & Keller, B. (2021). Host adaptation through hybridization: Genome analysis of triticale powdery mildew reveals unique combination of lineage-specific effectors. Molecular Plant-Microbe Interactions, 34(12), 1350-1357.
Fungi	Ascomycota	-	Leotiomycetes	Erysiphales	Erysiphaceae	Blumeria graminis f.sp. tritici	96224	Y	Y	Y	N	N	Y	PRJEB28180	SAMEA7746105	GCA_900519115.1	Müller, M. C., Praz, C. R., Sotiropoulos, A. G., Menardo, F., Kunz, L., Schudel, S., ... & Wicker, T. (2019). A chromosome‐scale genome assembly reveals a highly dynamic effector repertoire of wheat powdery mildew. New Phytologist, 221(4), 2176-2189.
Fungi	Ascomycota	-	Leotiomycetes	Helotiales	Sclerotiniaceae	Botrytis cinerea	B05 10	Y	Y	Y	N	N	Y	PRJNA15632	SAMN02953628	GCA_000143535.4	Staats, M., & van Kan, J. A. (2012). Genome update of Botrytis cinerea strains B05. 10 and T4.
Fungi	Ascomycota	Saccharomycotina	Pichiomycetes	Serinales	Debaryomycetaceae	Candida albicans	SC5314	Y	Y	Y	N	Y	N	PRJNA10701	SAMN02953594	GCA_000182965.3	Odds, F. C., Brown, A. J., & Gow, N. A. (2004). Candida albicans genome sequence: a platform for genomics in the absence of genetics. Genome biology, 5, 1-3.
Fungi	Ascomycota	Pezizomycotina	Sordariomycetes	Hypocreales	Bionectriaceae	Clonostachys chloroleuca	570-77 (v2)	Y	Y	Y	N	N	N	PRJEB32493	SAMEA5663351	GCA_902074915.1	Piombo, Edoardo, et al. "Insights into the ecological generalist lifestyle of Clonostachys fungi through analysis of their predicted secretomes." Frontiers in Microbiology 14 (2023): 1112673.
Fungi	Ascomycota	Pezizomycotina	Sordariomycetes	Hypocreales	Bionectriaceae	Clonostachys solani	CSOL1703	Y	Y	Y	N	N	N	PRJEB32493	SAMEA5663346	GCA_902141235.2	Piombo, Edoardo, et al. "Insights into the ecological generalist lifestyle of Clonostachys fungi through analysis of their predicted secretomes." Frontiers in Microbiology 14 (2023): 1112673.
Fungi	Ascomycota	Pezizomycotina	Sordariomycetes	Glomerellales	Glomerellaceae	Colletotrichum graminicola	M1 001	Y	Y	Y	N	N	Y	PRJNA37879	SAMN02953757	GCA_000149035.1	Becerra, S., Baroncelli, R., Boufleur, T. R., Sukno, S. A., & Thon, M. R. (2023). Chromosome-level analysis of the Colletotrichum graminicola genome reveals the unique characteristics of core and minichromosomes. Frontiers in microbiology, 14, 1129319.
Fungi	Ascomycota	-	Leotiomycetes	Erysiphales	Erysiphaceae	Erysiphe necator	EnFRAME01	Y	Y	Y	N	N	Y	PRJNA627990	SAMN14693176	GCA_024703715.1	Zaccaron, A. Z., Neill, T., Corcoran, J., Mahaffee, W. F., & Stergiopoulos, I. (2023). A chromosome-scale genome assembly of the grape powdery mildew pathogen Erysiphe necator reveals its genomic architecture and previously unknown features of its biology. Mbio, 14(4), e00645-23.
Fungi	Ascomycota	Pezizomycotina	Sordariomycetes	Hypocreales	Nectriaceae	Fusarium graminearum	PH1	Y	Y	Y	N	N	Y	PRJNA13839	SAMN02953593	GCA_000240135.3	King, R., Urban, M., & Hammond-Kosack, K. E. (2017). Annotation of Fusarium graminearum (PH-1) version 5.0. Genome announcements, 5(2), 10-1128.
Fungi	Ascomycota	Pezizomycotina	Sordariomycetes	Hypocreales	Nectriaceae	Fusarium oxysporum	Fo47	Y	Y	Y	N	N	(Y)	PRJNA624237	SAMN14572364	GCA_013085055.1	Wang, B., Yu, H., Jia, Y., Dong, Q., Steinberg, C., Alabouvette, C., ... & Guo, L. (2020). Chromosome-scale genome assembly of Fusarium oxysporum strain Fo47, a fungal endophyte and biocontrol agent. Molecular Plant-Microbe Interactions, 33(9), 1108-1111.
Fungi	Ascomycota	Pezizomycotina	Sordariomycetes	Hypocreales	Bionectriaceae	Geosmithia morbida	1262	Y	Y	Y	N	N	Y	PRJNA588799	SAMN13870095	GCA_012550715.1	Schuelke, T. A., Westbrook, A., Broders, K., Woeste, K., & MacManes, M. D. (2016). De novo genome assembly of Geosmithia morbida, the causal agent of thousand cankers disease. PeerJ, 4, e1952.	Utley, Curtis, et al. "Susceptibility of walnut and hickory species to Geosmithia morbida." Plant Disease 97.5 (2013): 601-607.
Fungi	Ascomycota	Pezizomycotina	Sordariomycetes	Magnaporthales	Pyriculariaceae	Magnaporthe oryzae / Pyricularia oryzae	70-15	Y	Y	Y	N	N	Y	PRJNA13840	SAMN02953596	GCA_000002495.2	Zheng, H., Zhong, Z., Shi, M., Zhang, L., Lin, L., Hong, Y., ... & Wang, Z. (2018). Comparative genomic analysis revealed rapid differentiation in the pathogenicity-related gene repertoires between Pyricularia oryzae and Pyricularia penniseti isolated from a Pennisetum grass. BMC genomics, 19, 1-11.
Fungi	Ascomycota	Pezizomycotina	Sordariomycetes	Hypocreales	Clavicipitaceae	Metarhizium brunneum	4556	Y	Y	Y	N	Y	N	PRJNA608152	SAMN15394350	GCA_013426205.1	Reinbacher, Lara, et al. "Preventive field application of Metarhizium brunneum in cover crops for wireworm control." Crop Protection 150 (2021): 105811.	Krell, Vivien, et al. "Encapsulation of Metarhizium brunneum enhances endophytism in tomato plants." Biological control 116 (2018): 62-73.
Fungi	Ascomycota	-	Eurotiomycetes	Onygenales	Arthrodermataceae	Microsporum canis	CBS 113480	Y	Y	Y	N	Y	N	PRJNA30939	SAMN02953735	GCA_000151145.1	Coelho, L. M., Cursino-Santos, J. R., Persinoti, G. F., Rossi, A., & Martinez-Rossi, N. M. (2013). The Microsporum canis genome is organized into five chromosomes based on evidence from electrophoretic karyotyping and chromosome end mapping. Medical mycology, 51(2), 208-2013.
Fungi	Ascomycota	Pezizomycotina	Sordariomycetes	Sordariales	Sordariaceae	Neurospora crassa	OR74A	Y	Y	Y	N	N	(N)	PRJNA13841	SAMN02953583	GCA_000182925.2	Roche, C. M., Loros, J. J., McCluskey, K., & Glass, N. L. (2014). Neurospora crassa: looking back and looking forward at a model microbe. American journal of botany, 101(12), 2022-2035.
Fungi	Ascomycota	Pezizomycotina	Dothideomycetes	Pleosporales	Didymosphaeriaceae	Paraphaeosphaeria sporulosa	AP3s5-JAC2a	Y	Y	Y	N	N	E	PRJNA239489	SAMN02745364	GCF_001642045.1	Baroncelli, Riccardo, et al. "Genome resources for the endophytic fungus Paraphaeosphaeria sporulosa." Molecular Plant-Microbe Interactions 33.9 (2020): 1098-1099.
Fungi	Ascomycota	Pezizomycotina	Dothideomycetes	Pleosporales	Phaeosphaeriaceae	Parastagonospora nodorum	SN15	Y	Y	Y	N	N	Y	PRJNA13754	SAMN02953619	GCF_000146915.1	Richards, Jonathan K., et al. "Reference quality genome assemblies of three Parastagonospora nodorum isolates differing in virulence on wheat." G3: Genes, Genomes, Genetics 8.2 (2018): 393-399.
Fungi	Ascomycota	-	Eurotiomycetes	Eurotiales	Aspergillaceae	Penicillium brevicompactum	IBT 35665	Y	Y	Y	N	N	N	PRJNA867151	SAMN30185303	GCA_028827555.1	Regueira, T. B., Kildegaard, K. R., Hansen, B. G., Mortensen, U. H., Hertweck, C., & Nielsen, J. (2011). Molecular basis for mycophenolic acid biosynthesis in Penicillium brevicompactum. Applied and environmental microbiology, 77(9), 3035-3043.
Fungi	Ascomycota	-	Eurotiomycetes	Eurotiales	Aspergillaceae	Penicillium digitatum	PdW03	Y	Y	Y	N	N	Y	PRJNA658435	SAMN04018713	GCA_016767815.1	Wang, M., Ruan, R., & Li, H. (2021). The completed genome sequence of the pathogenic ascomycete fungus Penicillium digitatum. Genomics, 113(2), 439-446.
Fungi	Ascomycota	-	Eurotiomycetes	Eurotiales	Aspergillaceae	Penicillium oxalicum	HP7-1	Y	Y	Y	N	N	Y	PRJNA772803	SAMN03106237	GCA_001723175.3	Zhao, S., Yan, Y. S., He, Q. P., Yang, L., Yin, X., Li, C. X., ... & Feng, J. X. (2016). Comparative genomic, transcriptomic and secretomic profiling of Penicillium oxalicum HP7-1 and its cellulase and xylanase hyper-producing mutant EU2106, and identification of two novel regulatory genes of cellulase and xylanase gene expression. Biotechnology for Biofuels, 9, 1-17.
Fungi	Ascomycota	Pezizomycotina	Dothideomycetes	Pleosporales	Leptosphaeriaceae	Plenodomus biglobosus	CA1	Y	Y	Y	N	N	Y	PRJNA660251	SAMN15952996	GCA_022343325.1	Frąc, Magdalena, Joanna Kaczmarek, and Małgorzata Jędryczka. "Metabolic capacity differentiates Plenodomus lingam from P. biglobosus Subclade ‘brassicae’, the causal agents of phoma leaf spotting and stem canker of oilseed rape (Brassica napus) in agricultural ecosystems." Pathogens 11.1 (2022): 50.	Bagi, Bianka, László Palkovics, and Marietta Petróczy. "Phylogenetic analysis of Plenodomus lingam and Plenodomus biglobosu
Fungi	Ascomycota	Pezizomycotina	Dothideomycetes	Pleosporales	Leptosphaeriaceae	Plenodomus lingam / Leptosphaeria maculans	CAN1	Y	Y	Y	N	N	Y	PRJNA660251	SAMN15948182	GCA_022343315.1	Frąc, Magdalena, Joanna Kaczmarek, and Małgorzata Jędryczka. "Metabolic capacity differentiates Plenodomus lingam from P. biglobosus Subclade ‘brassicae’, the causal agents of phoma leaf spotting and stem canker of oilseed rape (Brassica napus) in agricultural ecosystems." Pathogens 11.1 (2022): 50.	Bagi, Bianka, László Palkovics, and Marietta Petróczy. "Phylogenetic analysis of Plenodomus lingam and Plenodomus biglobosu
Fungi	Ascomycota	Pezizomycotina	Dothideomycetes	Pleosporales	Leptosphaeriaceae	Plenodomus tracheiphilus	IPT5	Y	Y	Y	N	N	Y	PRJNA223133	SAMN02744642	GCA_010093695.1	Sicilia, Angelo, et al. "Transcriptome analysis of Plenodomus tracheiphilus infecting rough lemon (Citrus jambhiri Lush.) indicates a mult
Fungi	Ascomycota	Taphrinomycotina	Pneumocystomycetes	Pneumocystales	Pneumocystaceae	Pneumocystis jirovecii	RU7	Y	Y	Y	N	Y	N	PRJNA223510	SAMN02380716	GCA_001477535.1	Ma, L., Chen, Z., Huang, D. W., Kutty, G., Ishihara, M., Wang, H., ... & Kovacs, J. A. (2016). Genome analysis of three Pneumocystis species reveals adaptation mechanisms to life exclusively in mammalian hosts. Nature communications, 7(1), 10740.
Fungi	Ascomycota	Pezizomycotina	Sordariomycetes	Hypocreales	Ophiocordycipitaceae	Purpureocillium takamizusanense	PT3	Y	Y	Y	N	Y	N	PRJNA685267	SAMN22138285	GCA_022605165.1	Lo, P. H., Y. C. Yu, and K. F. Pai. "First report of Purpureocillium takamizusanense as an omopathogenic fungus infecting Tessaratoma papillosa (Drury) in Taiwan." Journal of Plant Medicine 61.2/3 (2019): 27-30.
Fungi	Ascomycota	Saccharomycotina	Saccharomycetes	Saccharomycetales	Saccharomycetaceae	Saccharomyces cerevisiae	S288C	Y	Y	Y	N	N	N	PRJNA43747	-	GCA_000146045.2	Fisk, D. G., Ball, C. A., Dolinski, K., Engel, S. R., Hong, E. L., Issel‐Tarver, L., ... & Michael Cherry, J. (2006). Saccharomyces cerevisiae S288C genome annotation: a working hypothesis. Yeast, 23(12), 857-865.
Fungi	Ascomycota	Taphrinomycotina	Schizosaccharomycetes	Schizosaccharomycetales	Schizosaccharomycetaceae	Schizosaccharomyces pombe	972h-	Y	Y	Y	N	N	N	PRJNA13836	SAMEA3138176	GCA_000002945.2	Wood, V. (2005). Schizosaccharomyces pombe comparative genomics; from sequence to systems. In Comparative genomics: using fungi as models (pp. 233-285). Berlin, Heidelberg: Springer Berlin Heidelberg.
Fungi	Ascomycota	-	Leotiomycetes	Helotiales	Sclerotiniaceae	Sclerotinia sclerotiorum	1980 UF-70	Y	Y	Y	N	N	Y	PRJNA348385	SAMN05908049	GCA_001857865.1	Peng, F., Li, X., Wei, Z., & Han, G. (2024). The Complete Genome Sequence of Sclerotinia sclerotiorum (S1), One of the Pathogens Causing Sclerotinosis in Mulberry Fruit. PhytoFrontiers™, PHYTOFR-04.
Fungi	Ascomycota	Pezizomycotina	Sordariomycetes	Hypocreales	Hypocreaceae	Trichoderma asperellum	CBS 433.97	Y	Y	Y	N	N	Y	PRJNA207877	SAMN00769595	GCA_003025105.1	Yang, Yiling, et al. "Isolation and Identification of Trichoderma asperellum, the novel causal agent of green mold disease in sweetpotato." Plant Disease 105.6 (2021): 1711-1718.
Fungi	Ascomycota	-	Eurotiomycetes	Onygenales	Arthrodermataceae	Trichophyton tonsurans	CBS 112818	Y	Y	Y	N	Y	N	PRJNA38223	SAMN02953761	GCA_000151455.1	Kandemir, H., Dukik, K., Hagen, F., Ilkit, M., Gräser, Y., & de Hoog, G. S. (2020). Polyphasic discrimination of Trichophyton tonsurans and T. equinum from humans and horses. Mycopathologia, 185(1), 113-122.
Fungi	Ascomycota	Pezizomycotina	Dothideomycetes	Mycosphaerellales	Mycosphaerellaceae	Zymoseptoria brevis	Zb18110	Y	Y	Y	N	N	Y	PRJNA273516	SAMN03294124	GCA_000966595.1	Meile, L., Garrido‐Arandia, M., Bernasconi, Z., Peter, J., Schneller, A., Bernasconi, A., ... & Sánchez‐Vallet, A. (2023). Natural variation in Avr3D1 from Zymoseptoria sp. contributes to quantitative gene‐for‐gene resistance and to host specificity. New Phytologist, 238(4), 1562-1577.
Fungi	Basidiomycota	Agaricomycotina	Agaricomycetes	Agaricales	Agaricaceae	Agaricus bisporus var burnettii	H119_p4	Y	Y	Y	N	N	N	PRJNA635555	SAMN15043479	GCA_014872705.1	Foulongne-Oriol, M., Taskent, O., Kües, U., Sonnenberg, A. S., van Peer, A. F., & Giraud, T. (2021). Mating-type locus organization and mating-type chromosome differentiation in the bipolar edible button mushroom Agaricus bisporus. Genes, 12(7), 1079.
Fungi	Basidiomycota	Agaricomycotina	Tremellomycetes	Filobasidiales	Filobasidiaceae	Filobasidium floriforme	CBS 6241	Y	Y	Y	N	(Y)	N	PRJNA621322	SAMN14510447	GCA_021052385.1	Guerreiro, M. A., Ahrendt, S., Pangilinan, J., Chen, C., Yan, M., Lipzen, A., ... & Nowrousian, M. (2022). Draft genome sequences of strains CBS6241 and CBS6242 of the basidiomycetous yeast Filobasidium floriforme. G3, 12(2), jkab398.
Fungi	Basidiomycota	Agaricomycotina	Agaricomycetes	Agaricales	Agaricaceae	Lentinula edodes	Le(Bin) 0899 ss11	Y	Y	Y	N	N	N	PRJNA444093	SAMN08778769	GCA_021015755.1	Zhang, J., Shen, N., Li, C., Xiang, X., Liu, G., Gui, Y., ... & Xiao, Y. (2022). Population genomics provides insights into the genetic basis of adaptive evolution in the mushroom-forming fungus Lentinula edodes. Journal of Advanced Research, 38, 91-106.
Fungi	Basidiomycota	Ustilaginomycotina	Malasseziomycetes	Malasseziales	Malasseziaceae	Malassezia restricta	KCTC 27527	Y	Y	Y	N	Y	N	PRJNA477735	SAMN09478194	GCA_003290485.1	Park, M., Cho, Y. J., Lee, Y. W., & Jung, W. H. (2017). Whole genome sequencing analysis of the cutaneous pathogenic yeast Malassezia restricta and identification of the major lipase expressed on the scalp of patients with dandruff. Mycoses, 60(3), 188-197.
Fungi	Basidiomycota	Agaricomycotina	Agaricomycetes	Agaricales	Pleurotaceae	Pleurotus ostreatus	PC9	Y	Y	Y	N	N	N	PRJNA647232	SAMN15594696	GCA_014466165.1	Lee, Y. Y., Vidal-Diez de Ulzurrun, G., Schwarz, E. M., Stajich, J. E., & Hsueh, Y. P. (2021). Genome sequence of the oyster mushroom Pleurotus ostreatus strain PC9. G3, 11(2), jkaa008.
Fungi	Basidiomycota	Pucciniomycotina	Pucciniomycetes	Pucciniales	Pucciniaceae	Puccinia triticina	Pt15	Y	Y	Y	N	N	Y	PRJNA848635	SAMN28423237	GCA_026914185.1	Li, C., Qiao, L., Lu, Y., Xing, G., Wang, X., Zhang, G., ... & Zheng, W. (2023). Gapless genome assembly of Puccinia triticina provides insights into chromosome evolution in Pucciniales. Microbiology Spectrum, 11(1), e02828-22.
Fungi	Basidiomycota	Agaricomycotina	Agaricomycetes	Cantharellales	Ceratobasidiaceae	Rhizoctonia solani	AG-1 IA	Y	Y	Y	N	N	Y	PRJNA624219	SAMN14572378	GCA_016906535.1	Yang, Q., Yang, L., Wang, Y., Chen, Y., Hu, K., Yang, W., ... & Li, G. (2022). A High-Quality genome of Rhizoctonia solani, a devastating fungal pathogen with a wide host range. Molecular Plant-Microbe Interactions, 35(10), 954-958.
Fungi	Basidiomycota	Ustilaginomycotina	Ustilaginomycetes	Ustilaginales	Ustilaginaceae	Ustilago maydis	521	Y	Y	Y	N	N	Y	PRJNA1446	SAMN02900459	GCA_000328475.2	Kämper, J., Kahmann, R., Bölker, M., Ma, L. J., Brefort, T., Saville, B. J., ... & Birren, B. W. (2006). Insights from the genome of the biotrophic fungal plant pathogen Ustilago maydis. Nature, 444(7115), 97-101.
Fungi	Mucoromycota	-	Mucoromycetes	Mucorales	Rhizopodaceae	Rhizopus microsporus	ATCC 52813	Y	Y	Y	N	(N)	Y	PRJNA205957	SAMN02745869	GCA_002708625.1	Horn, F., Üzüm, Z., Möbius, N., Guthke, R., Linde, J., & Hertweck, C. (2015). Draft genome sequences of symbiotic and nonsymbiotic Rhizopus microsporus strains CBS 344.29 and ATCC 62417. Genome Announcements, 3(1), e01370-14.
Fungi	Mucoromycota	-	Mucoromycetes	Mucorales	Umbelopsidaceae	Umbelopsis ramanniana	AG	Y	Y	Y	N	N	N	PRJNA196032	SAMN02745731	GCA_025399195.1	Wang, Y. N., Liu, X. Y., & Zheng, R. Y. (2022). The Umbelopsis ramanniana sensu lato consists of five cryptic species. Journal of Fungi, 8(9), 895.
Oomycota	-	-	-	Pythiales	Pythiaceae	Pythium oligandrum	ATCC 38472_TT	Y	Y	Y	Y	N	N	PRJNA528861	SAMN11246703	GCA_005966545.1	Benhamou, Nicole, et al. "Pythium oligandrum: an example of opportunistic success." Microbiology 158.11 (2012): 2679-2694.	Liang, Dong, et al. "Horizontal gene transfer and tandem duplication shape the unique CAZyme complement of the mycoparasitic oomycetes Pythium oligandrum and Pythium periplocum." Frontiers in Microbiology 11 (2020): 581698.
Fungi	Ascomycota	Pezizomycotina	Dothideomycetes	Pleosporales	Leptosphaeriaceae	Ampelomyces quisqualis	BRIP 72107	Y	Y	Y	Y	N	N	PRJNA725554	SAMN18883311	GCA_018398575.1	Huth, Lauren, et al. "The “bipartite” structure of the first genome of Ampelomyces quisqualis, a common hyperparasite and biocontrol agent of powdery mildews, may point to its evolutionary origin from plant pathogenic fungi." Genome Biology and Evolution 13.8 (2021): evab182.
Fungi	Ascomycota	Pezizomycotina	Dothideomycetes	Pleosporales	Leptosphaeriaceae	Ampelomyces sp.	HMLAC05119	Y	Y	Y	Y	N	N	PRJNA333829	SAMN05446983	GCA_010094095.1	Németh, Márk Z., et al. "What is the role of the nitrate reductase (euknr) gene in fungi that live in nitrate-free environments? A targeted gene knock-out study in Ampelomyces mycoparasites." Fungal Biology 125.11 (2021): 905-913.
Fungi	Ascomycota	Pezizomycotina	Sordariomycetes	Hypocreales	Bionectriaceae	Clonostachys byssicola	CBYS24578	Y	Y	Y	Y	N	N	PRJEB32493	SAMEA5663355	GCA_902006505.2	Krauss, Ulrike, et al. "Mycoparasitism by Clonostachys byssicola and Clonostachys rosea on Trichoderma spp. from cocoa (Theobroma cacao) and implication for the design of mixed biocontrol agents." Biological Control 67.3 (2013): 317-327.
Fungi	Ascomycota	Pezizomycotina	Sordariomycetes	Hypocreales	Bionectriaceae	Clonostachys rosea	CLO192961	Y	Y	Y	Y	N	N	PRJEB32493	SAMEA5663345	GCA_902085965.1	Piombo, Edoardo, et al. "Insights into the ecological generalist lifestyle of Clonostachys fungi through analysis of their predicted secretomes." Frontiers in Microbiology 14 (2023): 1112673.
Fungi	Ascomycota	Pezizomycotina	Sordariomycetes	Hypocreales	Hypocreaceae	Escovopsis weberi	Escovopsis_CC031208-10	Y	Y	Y	Y	N	N	PRJNA253870	SAMN03431439	GCA_001278495.1	de Man, Tom JB, et al. "Small genome of the fungus Escovopsis weberi, a specialized disease agent of ant agriculture." Proceedings of the National Academy of Sciences 113.13 (2016): 3567-3572.
Fungi	Ascomycota	Pezizomycotina	Sordariomycetes	Hypocreales	Cordycipitaceae	Niveomyces insectorum	RCEF 264	Y	Y	Y	Y	N	N	PRJNA72727	SAMN04908330	GCA_001636815.1	Kobmoo, N., et al. "New mycoparasitic species in the genera Niveomyces and Pseudoniveomyces gen. nov.(Hypocreales: Cordycipitaceae), with sporothrix-like asexual morphs, from Thailand." Fungal Systematics and Evolution (2023).
Fungi	Ascomycota	Pezizomycotina	Dothideomycetes	Pleosporales	Didymosphaeriaceae	Paraphaeosphaeria minitans	Conio IMI134523	Y	Y	Y	Y	N	N	PRJNA588476	SAMN13245827	GCA_015832175.1	Nicot, Philippe C., et al. "Differential susceptibility to the mycoparasite Paraphaeosphaeria minitans among Sclerotinia sclerotiorum isolates." Tropical Plant Pathology 44 (2019): 82-93.
Fungi	Ascomycota	Pezizomycotina	Sordariomycetes	Hypocreales	Ophiocordycipitaceae	Purpureocillium lilacinum	PLFJ-1	Y	Y	Y	Y	Y	N	PRJNA308630	SAMN04404347	GCA_001653265.1	Masaphy, Segula. "First report on Purpureocillium lilacinum infection of indoor-cultivated morel primordia." Agriculture 12.5 (2022): 695.	Luangsa-Ard, Jennifer, et al. "Purpureocillium, a new genus for the medically important Paecilomyces lilacinus." FEMS microbiology letters 321.2 (2011): 141-149.
Fungi	Ascomycota	Pezizomycotina	Dothideomycetes	Pleosporales	Leptosphaeriaceae	Sphaerellopsis sp.	CBS235.51	Y	Y	Y	Y	N	N	PRJNA1130705	SAMN42216166	GCA_041753865.1	D’Angelo, Davide, et al. "﻿ IMA GENOME-F20 A draft genome assembly of Agroatheliarolfsii, Ceratobasidiumpapillatum, Pyrenopezizabrassicae, Neopestalotiopsismacadamiae, Sphaerellopsisfilum and genomic resources for Colletotrichumspaethianum and Colletotrichumfructicola." IMA fungus 16 (2025): e141732.
Fungi	Ascomycota	Pezizomycotina	Sordariomycetes	Hypocreales	Stachybotryaceae	Stachybotrys elegans	MPI-CAGE-CH-0235	Y	Y	Y	Y	N	N	PRJNA370118	SAMN06296943	GCA_020746835.1	Taylor, G., X. Wang, and S. H. Jabaji-Hare. "Detection of the mycoparasite Stachybotrys elegans, using primers with sequence-characterized amplification regions in conventional and real-time PCR." Canadian journal of plant pathology 25.1 (2003): 49-61.
Fungi	Ascomycota	Pezizomycotina	Sordariomycetes	Hypocreales	Hypocreaceae	Trichoderma atroviride	IMI 206040	Y	Y	Y	Y	N	N	PRJNA19867	SAMN02744066	GCA_000171015.2	Brunner, Kurt, et al. "Improvement of the fungal biocontrol agent Trichoderma atroviride to enhance both antagonism and induction of plant systemic disease resistance." Applied and environmental microbiology 71.7 (2005): 3959-3965.	Coppola, Mariangela, et al. "Trichoderma atroviride P1 colonization of tomato plants enhances both direct and indirect defense barriers against insects." Frontiers in physiology 10 (2019): 813.
Fungi	Ascomycota	Pezizomycotina	Sordariomycetes	Hypocreales	Hypocreaceae	Trichoderma citrinoviride	TUCIM 6016	Y	Y	Y	Y	(N)	N	PRJNA328283	SAMN05369575	GCA_003025115.1	Lin, H., Travisano, M., & Kazlauskas, R. J. (2016). Experimental evolution of Trichoderma citrinoviride for faster deconstruction of cellulose. Plos one, 11(1), e0147024.
Fungi	Ascomycota	Pezizomycotina	Sordariomycetes	Hypocreales	Hypocreaceae	Trichoderma gamsii	T6085	Y	Y	Y	Y	N	N	PRJNA252048	SAMN02849381	GCA_001481775.2	Chen, Jin-Lian, et al. "Endophytic Trichoderma gamsii YIM PH30019: a promising biocontrol agent with hyperosmolar, mycoparasitism, and antagonistic activities of induced volatile organic compounds on root-rot pathogenic fungi of Panax notoginseng." Journal of Ginseng Research 40.4 (2016): 315-324.
Fungi	Ascomycota	Pezizomycotina	Sordariomycetes	Hypocreales	Hypocreaceae	Trichoderma harzianum	CBS 226.95	Y	Y	Y	Y	N	N	PRJNA207867	SAMN00761861	GCA_003025095.1	Maruyama, Cintia Rodrigues, et al. "Encapsulation of Trichoderma harzianum preserves enzymatic activity and enhances the potential for biological control." Frontiers in Bioengineering and Biotechnology 8 (2020): 225.
Fungi	Ascomycota	Pezizomycotina	Sordariomycetes	Hypocreales	Hypocreaceae	Trichoderma virens	Gv29-8	Y	Y	Y	Y	N	N	PRJNA19983	SAMN02744059	GCA_000170995.2	Howell, Charles R. "Understanding the mechanisms employed by Trichoderma virens to effect biological control of cotton diseases." Phytopathology 96.2 (2006): 178-180.
Fungi	Ascomycota	Pezizomycotina	Sordariomycetes	Glomerellales	Plectosphaerellaceae	Verticillium dahliae	VdLs.17	Y	Y	Y	Y	Y	Y	PRJNA28529	SAMN02953716	GCA_000150675.2	Song, Ranran, et al. "An overview of the molecular genetics of plant resistance to the Verticillium wilt pathogen Verticillium dahliae." International journal of molecular sciences 21.3 (2020): 1120.
Fungi	Basidiomycota	Agaricomycotina	Tremellomycetes	Tremellales	Cryptococcaceae	Cryptococcus depauperatus	CBS 7841	Y	Y	Y	Y	N	N	PRJNA200572	SAMN02086252	GCA_001720195.2	Guterres, D. C., Ndacnou, M. K., Saavedra-Tobar, L. M., Salcedo-Sarmiento, S., Colmán, A. A., Evans, H. C., & Barreto, R. W. (2021). Cryptococcus depauperatus, a close relative of the human-pathogen C. neoformans, associated with coffee leaf rust (Hemileia vastatrix) in Cameroon. Brazilian Journal of Microbiology, 52(4), 2205-2214.
Fungi	Basidiomycota	Agaricomycotina	Tremellomycetes	Tremellales	Naemateliaceae	Naematelia encephala	68-887.2	Y	Y	Y	Y	N	N	PRJNA330699	SAMN05421904	GCA_002105065.1	Aliyu, H., Gorte, O., Zhou, X., Neumann, A., & Ochsenreither, K. (2020). In silico proteomic analysis provides insights into phylogenomics and plant biomass deconstruction potentials of the tremelalles. Frontiers in bioengineering and biotechnology, 8, 226.	Zugmaier et al. (1994); Roberts (1999b)
Fungi	Basidiomycota	Agaricomycotina	Tremellomycetes	Tremellales	Tremellaceae	Tremella mesenterica	DSM 1558 Fries	Y	Y	Y	Y	N	N	PRJNA32829	SAMN02744056	GCA_000271645.1	Iturbe-Espinoza, P., Gil-Moreno, S., Lin, W., Calatayud, S., Palacios, Ò., Capdevila, M., & Atrian, S. (2016). The fungus Tremella mesenterica encodes the longest metallothionein currently known: gene, protein and metal binding characterization. PLoS One, 11(2), e0148651.	Zugmaier et al. (1994, 1995); Roberts (1995)
Fungi	Chytridiomycota	-	Chytridiomycetes	Caulochytriales	Caulochytriaceae	Caulochytrium protostelioides	ATCC 52028	Y	Y	Y	Y	N	N	PRJNA421608	SAMN08148457	GCA_003615045.1	Ahrendt, S. R., Quandt, C. A., Ciobanu, D., Clum, A., Salamov, A., Andreopoulos, B., ... & Grigoriev, I. V. (2018). Leveraging single-cell genomics to expand the fungal tree of life. Nature Microbiology, 3(12), 1417-1428.
Fungi	Cryptomycota/Rozellomycota	-	Rozellomycetes	Rozellales	Rozellaceae	Rozella allomycis	CSF 55	Y	Y	Y	Y	N	N	PRJNA81749	SAMN01940551	GCA_000442015.1	Ahrendt, S. R., Quandt, C. A., Ciobanu, D., Clum, A., Salamov, A., Andreopoulos, B., ... & Grigoriev, I. V. (2018). Leveraging single-cell genomics to expand the fungal tree of life. Nature Microbiology, 3(12), 1417-1428.
Fungi	Zoopagomycota	(Kickxellomycotina)	Dimargaritomycetes	Dimargaritales	Dimargaritaceae	Dimargaris cristalligena	RSA 1219	Y	Y	Y	Y	N	N	PRJNA650746	SAMN15720059	GCA_027576995.1	Ahrendt, S. R., Quandt, C. A., Ciobanu, D., Clum, A., Salamov, A., Andreopoulos, B., ... & Grigoriev, I. V. (2018). Leveraging single-cell genomics to expand the fungal tree of life. Nature Microbiology, 3(12), 1417-1428.
Fungi	Zoopagomycota	Zoopagomycotina	Zoopagomycetes	Zoopagales	Piptocephalidaceae	Piptocephalis tieghemiana	RSA 1565	Y	Y	Y	Y	N	N	PRJNA470435	SAMN27763651	GCA_025603285.1	Cruz, Mateus Oliveira da, et al. "An overview on the mycoparasitic Piptocephalis (Zoopagomycota): taxonomic notes and geographic distribution with new occurrences for South America." Acta Botanica Brasilica 37 (2023): e20220251.
Fungi	Zoopagomycota	Zoopagomycotina	Zoopagomycetes	Zoopagales	Piptocephalidaceae	Syncephalis fuscata	S228	Y	Y	Y	Y	N	N	PRJNA332249	SAMN05445131	GCA_025786725.1	Tabima, J. F., Trautman, I. A., Chang, Y., Wang, Y., Mondo, S., Kuo, A., ... & Spatafora, J. W. (2020). Phylogenomic analyses of non-dikarya fungi supports horizontal gene transfer driving diversification of secondary metabolism in the amphibian gastrointestinal symbiont, Basidiobolus. G3: Genes, Genomes, Genetics, 10(9), 3417-3433.
Fungi	Zoopagomycota	Zoopagomycotina	Zoopagomycetes	Zoopagales	Piptocephalidaceae	Syncephalis plumigaleata	NRRL S24	Y	Y	Y	Y	N	N	PRJNA332252	SAMN05445192	GCA_025201365.1	Lazarus, K. L., Benny, G. L., Ho, H. M., & Smith, M. E. (2017). Phylogenetic systematics of Syncephalis (Zoopagales, Zoopagomycotina), a genus of ubiquitous mycoparasites. Mycologia, 109(2), 333-349.
Fungi	Zoopagomycota	Zoopagomycotina	Zoopagomycetes	Zoopagales	Sigmoideomycetaceae	Thamnocephalis sphaerospora	RSA 1356	Y	Y	Y	Y	N	N	PRJNA421763	SAMN09741940	GCA_003614735.1	Ahrendt, S. R., Quandt, C. A., Ciobanu, D., Clum, A., Salamov, A., Andreopoulos, B., ... & Grigoriev, I. V. (2018). Leveraging single-cell genomics to expand the fungal tree of life. Nature Microbiology, 3(12), 1417-1428.
Fungi	Zoopagomycota	Kickxellomycotina	Dimargaritomycetes	Dimargaritales	Dimargaritaceae	Tieghemiomyces parasiticus	RSA 861	Y	Y	Y	Y	N	N	PRJNA676425	SAMN16772653	GCA_027575765.1	Reynolds, Nicole K., et al. "Mycoparasites, gut dwellers, and saprotrophs: Phylogenomic reconstructions and comparative analyses of Kickxellomycotina fungi." Genome biology and evolution 15.1 (2023): evac185.

## Sheet: Supplementary Table 2
Supplementary Table S2. Identity of known cellulase and related proteins with the mycoparasites A. quisqualis and P. minitans, and its close non-mycoparasitic relative P. sporulosa
Name	ID	Species	A. quisqualis	Protein Identity %	P.minitans	P. sporulosa
Leptosphaeria_maculans_JN3_similar_to_Endoglucanase_precursor_Endo1_4beta_glucanase_Cellulase_LEMA_P046190	XM_003835230.1 Leptosphaeria maculans JN3 similar to Endoglucanase precursor (Endo-1,4-beta-glucanase) (Cellulase) (LEMA_P046190.1)	Leptosphaeria maculans JN3	chr09-gene-5.10	0.81	KAF9738515.1 cellulase	XP_018037689.1 endoglucanase-like protein precursor
Aspergillus_clavatus_NRRL_1_endoglucanase_cellulase_putative_ACLA_081310	XM_001267868.1 Aspergillus clavatus NRRL 1 endoglucanase/cellulase, putative (ACLA_081310)	Aspergillus clavatus	chr09-gene-5.10	0.53	No
cellulase_Trichoderma_gamsii_TGAM01_v210915	XP_018656481 TGAM01_v210915 [GeneID=29990372]	Trichoderma gamsii	chr09-gene-5.10	0.28
Fusarium_subglutinans_cellulase_glycosyl_hydrolase_family_5_domain_protein_FSUBG_3482	XM_036681367.1 Fusarium subglutinans cellulase (glycosyl hydrolase family 5) domain protein (FSUBG_3482)	Fusarium subglutinans	chr09-gene-5.10	0.28
endoglucanase5_Alternaria_rosae_protein	XP_046020208.1 endoglucanase-5	Alternaria rosae	chr10-gene-18.74	0.77	KAF9729102.1 glycoside hydrolase family 45 protein	XP_018031233.1 glycoside hydrolase
cellulase_Alternaria_alternata_CC77DRAFT_556163_prot	XP_018380152.1 CC77DRAFT_556163 [GeneID=29117757]	Alternaria alternata	chr09-gene-0.20	0.75	KAF9733530.1 glycosyl hydrolase family 6 protein, KAF9733382.1 exoglucanase-6A	XP_018040300.1 1,4-beta cellobiohydrolase
cellulase_Alternaria_alternata_CC77DRAFT_556163_prot	XP_018380152.1 CC77DRAFT_556163 [GeneID=29117757]	Alternaria alternata	chr02-gene-6.39	0.4	KAF9739434.1 Cellobiohydrolase II	XP_018040300.1 1,4-beta cellobiohydrolase
Leptosphaeria_maculans_JN3_similar_to_glycosyl_hydrolase_family_5_protein_cellulase_LEMA_P058380	XM_003834121.1 Leptosphaeria maculans JN3 similar to glycosyl hydrolase family 5 protein/cellulase (LEMA_P058380.1)	Leptosphaeria maculans JN3	chr11-gene-14.62	0.7	KAF9734383.1 beta-1,6-galactanase	XP_018031792.1 glycosyl hydrolase family 5 protein-like protein/cellulase
cellulase_Paraphaeosphaeria_sporulosa_CC84DRAFT_495773	XP_018041167.1 CC84DRAFT_495773 [GeneID=28770009]	Paraphaeosphaeria sporulosa	chr11-gene-14.62	0.31
Leptosphaeria_maculans_JN3_similar_to_glycosyl_hydrolase_family_5_protein_cellulase_LEMA_P058380	XM_003834121.1 Leptosphaeria maculans JN3 similar to glycosyl hydrolase family 5 protein/cellulase (LEMA_P058380.1)	Leptosphaeria maculans JN3	chr09-gene-18.96	0.38
cellulase_B_EG_B_Leptosphaeria_maculans_JN3_LEMA_P120740	XP_003838027.1 LEMA_P120740.1 [GeneID=13291138]	Leptosphaeria maculans JN3	chr12-gene-9.13	0.67	KAF9735454.1 glycoside hydrolase family 5 protein	XP_018037211.1 endoglucanase Cel5C
cellulase_Aspergillus_bombycis_ABOM_004556	XP_022390169 ABOM_004556 [GeneID=34447946]	Aspergillus bombycis ABOM 004556	chr12-gene-9.13	0.56
Ces7_contig_4_seg_candidate_Exoglucanase_protein		A. quisqualis	chr03-gene-25.35	1	KAF9734583.1 glucan 1,3-beta-glucosidase	XP_018034564.1 beta-1,3-glucanase
Geosmithia_morbida_cellulase_GMORB2_0666	XM_035462651.1 Geosmithia morbida cellulase (GMORB2_0666)	Geosmithia morbida	chr11-gene-4.67	0.45	KAF9729190.1 endoglucanase type c	XP_018031386.1 glycoside hydrolase
Geosmithia_morbida_cellulase_GMORB2_0666	XM_035462651.1 Geosmithia morbida cellulase (GMORB2_0666)	Geosmithia morbida	chr08-gene-23.3	0.4	KAF9739834.1 exoglucanase type c precursor	XP_018038892.1 exoglucanase-like protein 1 precursor, XP_018030994.1 cellobiohydrolase I-I
Penicillium_verhagenii_cellulase_N7466_007673	XM_057167062.1 Penicillium verhagenii cellulase (N7466_007673)	Penicillium verhagenii	chr09-gene-13.42	0.26	KAF9741219.1 putative exo-beta-1,3-glucanase, KAF9731191.1 beta-glucosidase 6	XP_018042659.1 glycoside hydrolase, XP_018038160.1 glycoside hydrolase family 5 protein
Penicillium_verhagenii_cellulase_N7466_007673	XM_057167062.1 Penicillium verhagenii cellulase (N7466_007673)	Penicillium verhagenii	chr01-gene-30.63	0.25	KAF9732408.1 beta-glucosidase 6	XP_018032470.1 glycoside hydrolase
Penicillium_verhagenii_cellulase_N7466_007673	XM_057167062.1 Penicillium verhagenii cellulase (N7466_007673)	Penicillium verhagenii	chr10-gene-18.73	0.24	KAF9731191.1 beta-glucosidase 6	XP_018038160.1 glycoside hydrolase family 5 protein

## Sheet: Supplementary Table 3
Supplementary Table S3. List of the species included in each taxon group for the CAZyme analyses (with the codes used in Fig. 2), along with the counts of protein assigned to four of CAZyme families with possible association to mycoparasitism
Taxon	Taxon 2	Species	Code	AA11	AA3.2	AA9	GT2_Chitin_synth_2
Mycoparasites (Specialists)	01.Specialists Pleosporales	Ampelomyces quisqualis Ces7 rnd3 all maker	amp_qui	5	11	20	8
Mycoparasites (Specialists)	01.Specialists Pleosporales	Ampelomyces sp HMLAC05119	amp_sp2	5	11	25	7
Mycoparasites (Specialists)	01.Specialists Pleosporales	Paraphaeosphaeria minitans ConioIMI134523	pas_min	12	11	28	10
Mycoparasites (Specialists)	01.Specialists Pleosporales	Sphaerellopsis sp CBS235 51	sph_fil	6	13	17	7
Mycoparasites (Specialists)	02.Specialists	Caulochytrium protostelioides ATCC52028	cau_pro	4	1	1	9
Mycoparasites (Specialists)	02.Specialists	Cryptococcus depauperatus CBS7841	cry_dep	1	1	1	8
Mycoparasites (Specialists)	02.Specialists	Dimargaris cristalligena RSA1219	dmg_cri	17	0	0	5
Mycoparasites (Specialists)	02.Specialists	Escovopsis weberi LGSR01	esv_web	2	2	1	8
Mycoparasites (Specialists)	02.Specialists	Lecanicillium fungicola Babe33	lec_fun	9	29	1	6
Mycoparasites (Specialists)	02.Specialists	Naematelia encephala 68 887 2	nae_enc	1	2	0	8
Mycoparasites (Specialists)	02.Specialists	Niveomyces insectorum RCEF264	niv_ins	3	6	16	7
Mycoparasites (Specialists)	02.Specialists	Parasitella parasitica NRRL2501	pal_par	0	2	0	25
Mycoparasites (Specialists)	02.Specialists	Piptocephalis cylindrospora RSA2659	pip_cyl	6	0	0	5
Mycoparasites (Specialists)	02.Specialists	Piptocephalis tieghemiana RSA1565	pip_tie	8	0	1	9
Mycoparasites (Specialists)	02.Specialists	Rozella allomycis CSF55	roz_all	6	0	1	4
Mycoparasites (Specialists)	02.Specialists	Syncephalis fuscata S228	syn_fus	29	1	1	10
Mycoparasites (Specialists)	02.Specialists	Syncephalis plumigaleata NRRL S24	syn_plu	21	0	0	11
Mycoparasites (Specialists)	02.Specialists	Tieghemiomyces parasiticus RSA861	tie_par	27	0	0	10
Mycoparasites (Specialists)	02.Specialists	Tolypocladium paradoxum NRBC100945	tol_par	4	5	1	7
Mycoparasites (Specialists)	02.Specialists	Tremella mesenterica DSM1558 Fries	tre_mes	1	2	0	8
Other Fungi	03.Generalists	Clonostachys rosea CLO192961	-	5	29	30	12
Other Fungi	03.Generalists	Clonostachys rosea f rosea IK726	-	6	31	30	13
Other Fungi	03.Generalists	Stachybotrys elegans MPICAGECH0235	-	7	43	41	8
Other Fungi	03.Generalists	Thamnocephalis sphaerospora RSA1356	-	13	0	1	7
Other Fungi	03.Generalists	Trichoderma aggressivum f europaeum CBS100526	-	3	15	3	8
Other Fungi	03.Generalists	Trichoderma asperellum CBS43397	-	3	10	3	8
Other Fungi	03.Generalists	Trichoderma atroviride IMI206040	-	2	8	3	8
Other Fungi	03.Generalists	Trichoderma citrinoviride TUCIM6016	-	3	10	3	8
Other Fungi	03.Generalists	Trichoderma gamsii T6085	-	2	12	2	8
Other Fungi	03.Generalists	Trichoderma harzianum CBS226 95	-	3	15	3	8
Other Fungi	03.Generalists	Trichoderma virens Gv29-8	-	4	12	3	9
Other Fungi	04.Relatives Pleosporales	Alternaria atra CS162	-	6	23	37	11
Other Fungi	04.Relatives Pleosporales	Bipolaris maydis C5	-	13	24	25	8
Other Fungi	04.Relatives Pleosporales	Bipolaris sorokiniana ND90Pr	-	9	21	24	7
Other Fungi	04.Relatives Pleosporales	Leptosphaeria biglobosa CA1	-	5	18	21	10
Other Fungi	04.Relatives Pleosporales	Paraphaeosphaeria sporulosa AP3s5JAC2a	-	5	22	42	10
Other Fungi	04.Relatives Pleosporales	Parastagonospora nodorum SN15	-	5	24	29	7
Other Fungi	04.Relatives Pleosporales	Plenodomus lindquistii US01n	-	5	19	25	8
Other Fungi	04.Relatives Pleosporales	Plenodomus lingam CAN1	-	4	15	20	8
Other Fungi	04.Relatives Pleosporales	Plenodomus lingam JN3	-	5	15	22	9
Other Fungi	04.Relatives Pleosporales	Plenodomus tracheiphilus IPT5	-	10	21	29	10
Other Fungi	05.Pathogens	Arthrobotrys entomopaga CBS642	-	2	5	26	7
Other Fungi	05.Pathogens	Arthrobotrys flagrans CBSH5679	-	2	8	23	6
Other Fungi	05.Pathogens	Beauveria bassiana ARSEF2860	-	4	7	1	9
Other Fungi	05.Pathogens	Beauveria brongniartii RCEF3172	-	5	7	1	9
Other Fungi	05.Pathogens	Blumeria graminis f. sp. tritici 96224	-	2	1	1	7
Other Fungi	05.Pathogens	Blumeria graminis fsp triticale THUN12 v1	-	2	1	1	7
Other Fungi	05.Pathogens	Botrytis cinerea B05.10	-	2	24	10	11
Other Fungi	05.Pathogens	Clonostachys byssicola 245 78	-	5	30	32	11
Other Fungi	05.Pathogens	Clonostachys chloroleuca 570 77	-	6	27	44	12
Other Fungi	05.Pathogens	Clonostachys rhizophaga CABFNQ02	-	6	26	28	12
Other Fungi	05.Pathogens	Clonostachys solani 1703	-	5	23	18	11
Other Fungi	05.Pathogens	Colletotrichum gloeosporioides Lc1	-	5	42	29	8
Other Fungi	05.Pathogens	Colletotrichum graminicola M1.001	-	3	24	28	9
Other Fungi	05.Pathogens	Colletotrichum lupini IMI504893	-	6	34	25	9
Other Fungi	05.Pathogens	Cordyceps fumosorosea ARSEF2679	-	5	10	1	8
Other Fungi	05.Pathogens	Cordyceps javanica IJ1G	-	9	10	1	9
Other Fungi	05.Pathogens	Cordyceps militaris CM01	-	4	10	1	8
Other Fungi	05.Pathogens	Cryptococcus gattii VGV MF34	-	1	1	1	7
Other Fungi	05.Pathogens	Cryptococcus neoformans var neoformans JEC21	-	1	3	1	6
Other Fungi	05.Pathogens	Erysiphe necator EnFRAME01	-	2	1	1	7
Other Fungi	05.Pathogens	Geosmithia morbida 1262	-	2	3	2	7
Other Fungi	05.Pathogens	Lecanicillium saksenae VT01	-	7	10	1	8
Other Fungi	05.Pathogens	Metarhizium acridum CQMa102	-	5	10	1	7
Other Fungi	05.Pathogens	Metarhizium album ARSEF1941	-	5	6	1	8
Other Fungi	05.Pathogens	Metarhizium brunneum 4556	-	6	13	1	8
Other Fungi	05.Pathogens	Metarhizium robertsii ARSEF23	-	7	11	1	8
Other Fungi	05.Pathogens	Mucor mucedo NRRL3635	-	0	2	0	23
Other Fungi	05.Pathogens	Mucor velutinosus NIH1002	-	0	2	0	25
Other Fungi	05.Pathogens	Ophiobolus disseminans CBS 113818	-	6	23	42	10
Other Fungi	05.Pathogens	Pneumocystis jirovecii RU7	-	0	0	0	0
Other Fungi	05.Pathogens	Pneumocystis murina B123	-	0	0	0	0
Other Fungi	05.Pathogens	Puccinia graminis fsp tritici CRL 75 36 700 3	-	0	8	3	11
Other Fungi	05.Pathogens	Puccinia striiformis fsp tritici 134E16A 17 33	-	0	13	3	11
Other Fungi	05.Pathogens	Puccinia triticina Pt15	-	0	6	4	7
Other Fungi	05.Pathogens	Purpureocillium lavendulum YMF1000683	-	6	14	3	8
Other Fungi	05.Pathogens	Purpureocillium lilacinum PLFJ1	-	4	11	3	8
Other Fungi	05.Pathogens	Purpureocillium takamizusanense PT3	-	4	10	1	11
Other Fungi	05.Pathogens	Pyricularia oryzae 70 15	-	7	13	23	8
Other Fungi	05.Pathogens	Rhizoctonia solani AG1-IA	-	0	17	34	8
Other Fungi	05.Pathogens	Sclerotinia sclerotiorum 1980 UF-70	-	2	17	9	10
Other Fungi	05.Pathogens	Sclerotinia trifoliorum SwB9	-	2	17	9	8
Other Fungi	05.Pathogens	Stachybotrys chartarum IBT40293	-	3	21	49	8
Other Fungi	05.Pathogens	Stachybotrys chlorohalonata IBT40285	-	4	16	44	8
Other Fungi	05.Pathogens	Ustilago maydis 521	-	0	8	0	8
Other Fungi	05.Pathogens	Verticillium dahliae VdLs.17	-	2	17	27	9
Other Fungi	05.Pathogens	Verticillium nonalfalfae VnAa140	-	2	21	27	8
Other Fungi	05.Pathogens	Zymoseptoria brevis ZB18110	-	5	18	1	7
Other Fungi	05.Pathogens	Zymoseptoria tritici IPO323	-	5	13	2	8
Other Fungi	06.Other Fungi	Absidia glauca CBS10148	-	0	0	0	30
Other Fungi	06.Other Fungi	Absidia repens NRRL1336	-	0	0	0	32
Other Fungi	06.Other Fungi	Agaricus bisporus H97	-	0	33	11	8
Other Fungi	06.Other Fungi	Aspergillus flavus NRRL3357	-	4	28	9	11
Other Fungi	06.Other Fungi	Aspergillus fumigatus Af293	-	3	9	7	8
Other Fungi	06.Other Fungi	Aspergillus nidulans FGSCA4	-	2	19	9	8
Other Fungi	06.Other Fungi	Aspergillus niger CBS101883	-	3	27	7	9
Other Fungi	06.Other Fungi	Aspergillus oryzae RIB40	-	4	25	8	10
Other Fungi	06.Other Fungi	Candida albicans SC5314	-	0	0	0	4
Other Fungi	06.Other Fungi	Candida dubliniensis CD36	-	0	0	0	4
Other Fungi	06.Other Fungi	Candida jiufengensis CBS10846	-	0	0	0	4
Other Fungi	06.Other Fungi	Candida orthopsilosis Co90 125	-	0	0	0	4
Other Fungi	06.Other Fungi	Candida theae CBS12239	-	0	0	0	4
Other Fungi	06.Other Fungi	Cladosporium sp JES115	-	5	10	2	7
Other Fungi	06.Other Fungi	Filobasidium floriforme CBS6241	-	1	2	5	7
Other Fungi	06.Other Fungi	Fusarium graminearum PH-1	-	4	13	13	12
Other Fungi	06.Other Fungi	Fusarium oxysporum Fo47	-	4	20	14	13
Other Fungi	06.Other Fungi	Kickxella alabastrina RSA675	-	12	0	11	11
Other Fungi	06.Other Fungi	Lentinula edodes LeBin0899 ss11	-	0	19	12	8
Other Fungi	06.Other Fungi	Malassezia japonica CBS9431	-	0	2	0	7
Other Fungi	06.Other Fungi	Malassezia restricta KCTC27527	-	0	4	0	6
Other Fungi	06.Other Fungi	Malassezia vespertilionis CBS15041	-	0	2	0	6
Other Fungi	06.Other Fungi	Microsporum canis CBS113480	-	4	4	0	7
Other Fungi	06.Other Fungi	Mitosporidium daphniae UGP3	-	1	0	0	3
Other Fungi	06.Other Fungi	Naganishia albida 5307AI	-	1	2	2	6
Other Fungi	06.Other Fungi	Nannizzia gypsea CBS118893	-	5	3	0	7
Other Fungi	06.Other Fungi	Neurospora crassa OR74A	-	4	3	14	8
Other Fungi	06.Other Fungi	Neurospora tetrasperma FGSC2508	-	4	3	14	7
Other Fungi	06.Other Fungi	Neurospora tetraspora CBS560 94	-	4	6	19	7
Other Fungi	06.Other Fungi	Ophiocordyceps sinensis IOZ07	-	3	9	1	9
Other Fungi	06.Other Fungi	Penicillium arizonense CBS141311	-	9	27	5	10
Other Fungi	06.Other Fungi	Penicillium brevicompactum IBT35665	-	3	24	5	9
Other Fungi	06.Other Fungi	Penicillium digitatum PdW03	-	2	12	1	9
Other Fungi	06.Other Fungi	Penicillium oxalicum HP7 1	-	2	9	4	9
Other Fungi	06.Other Fungi	Penicillium roqueforti LCP96 04111	-	3	16	3	9
Other Fungi	06.Other Fungi	Penicillium solitum IBT29525	-	2	21	4	9
Other Fungi	06.Other Fungi	Phakopsora pachyrhizi MT2006	-	0	2	3	9
Other Fungi	06.Other Fungi	Pleurotus ostreatus PC9	-	0	38	29	9
Other Fungi	06.Other Fungi	Pyrococcus furiosus DSM3638	-	0	0	0	0
Other Fungi	06.Other Fungi	Rhizopus microsporus ATCC52813	-	0	2	0	24
Other Fungi	06.Other Fungi	Saccharomyces cerevisiae S288C	-	0	0	0	3
Other Fungi	06.Other Fungi	Saccharomyces eubayanus FM1318	-	0	0	0	3
Other Fungi	06.Other Fungi	Saccharomyces kudriavzevii IFO1802	-	0	0	0	3
Other Fungi	06.Other Fungi	Saccharomyces mikatae IFO1815	-	0	0	0	3
Other Fungi	06.Other Fungi	Saccharomyces paradoxus CBS432	-	0	0	0	3
Other Fungi	06.Other Fungi	Schizosaccharomyces cryophilus OY26	-	0	0	0	1
Other Fungi	06.Other Fungi	Schizosaccharomyces osmophilus CBS15793	-	0	0	0	1
Other Fungi	06.Other Fungi	Schizosaccharomyces pombe 972h-	-	0	0	0	1
Other Fungi	06.Other Fungi	Tolypocladium capitatum CBS113982	-	2	3	1	7
Other Fungi	06.Other Fungi	Tolypocladium ophioglossoides CBS100239	-	4	9	1	8
Other Fungi	06.Other Fungi	Trichoderma longibrachiatum ATCC18648	-	3	8	3	8
Other Fungi	06.Other Fungi	Trichoderma reesei QM6a	-	3	8	3	8
Other Fungi	06.Other Fungi	Trichophyton benhamiae CBS112371	-	4	2	0	7
Other Fungi	06.Other Fungi	Trichophyton equinum CBS127 97	-	6	3	0	7
Other Fungi	06.Other Fungi	Trichophyton interdigitale UCMS IGIB CI11	-	5	2	0	7
Other Fungi	06.Other Fungi	Trichophyton tonsurans CBS112818	-	4	2	0	7
Other Fungi	06.Other Fungi	Trichophyton verrucosum HKI0517	-	5	2	0	7
Other Fungi	06.Other Fungi	Umbelopsis ramanniana AG	-	0	3	0	21
Oomycota	07.Oomycota	Aphanomyces astaci APO3	-	0	5	0	8
Oomycota	07.Oomycota	Globisporangium splendens rgcb1	-	0	2	0	1
Oomycota	07.Oomycota	Phytophthora infestans 1306	-	0	5	0	2
Oomycota	07.Oomycota	Pythium insidiosum Pi050C3	-	1	2	1	1
Oomycota	07.Oomycota	Pythium insidiosum PiS	-	0	4	3	3
Oomycota	07.Oomycota	Pythium oligandrum ATCC	-	0	3	16	2
Oomycota	07.Oomycota	Saprolegnia diclina VS20	-	0	2	0	5
Holozoa	08.Holozoa	Amphimedon queenslandica ACUQ01	-	0	0	0	3
Holozoa	08.Holozoa	Bos taurus HerefordL1Dominette01449	-	0	5	0	0
Holozoa	08.Holozoa	Branchiostoma floridae S238NH82	-	0	2	0	15
Holozoa	08.Holozoa	Canis lupus familiaris Tasha	-	0	1	0	0
Holozoa	08.Holozoa	Capitella teleta IESC2004	-	0	11	0	4
Holozoa	08.Holozoa	Capsaspora owczarzaki ATCC30864	-	0	1	0	0
Holozoa	08.Holozoa	Crocodylus porosus CporErrol	-	0	1	0	0
Holozoa	08.Holozoa	Daphnia pulex KAP4	-	0	33	0	5
Holozoa	08.Holozoa	Delphinapterus leucas GAN ISIS	-	0	1	0	2
Holozoa	08.Holozoa	Drosophila melanogaster dm6	-	0	20	0	5
Holozoa	08.Holozoa	Felis catus Fca126	-	0	4	0	0
Holozoa	08.Holozoa	Homo sapiens hg38	-	0	1	0	1
Holozoa	08.Holozoa	Hydra vulgaris 105	-	0	5	0	2
Holozoa	08.Holozoa	Lottia gigantea AMQO01	-	0	2	0	12
Holozoa	08.Holozoa	Monosiga brevicollis MX1	-	0	1	0	0
Holozoa	08.Holozoa	Mus musculus C57BL6J	-	0	3	0	1
Holozoa	08.Holozoa	Myotis myotis mMyoMyo1	-	0	4	0	1
Holozoa	08.Holozoa	Nematostella vectensis CAKOAW01	-	0	1	0	3
Holozoa	08.Holozoa	Orcinus orca CAKZJT01	-	0	2	0	0
Holozoa	08.Holozoa	Ornithorhynchus anatinus Pmale09	-	0	3	0	2
Holozoa	08.Holozoa	Oryctolagus cuniculus DNA2018	-	0	1	0	3
Holozoa	08.Holozoa	Phascolarctos cinereus Bilbo61053	-	0	5	0	1
Holozoa	08.Holozoa	Saccoglossus kowalevskii ACQM01	-	0	3	0	0
Holozoa	08.Holozoa	Sphaeroforma arctica JP610	-	0	11	0	2
Holozoa	08.Holozoa	Strongylocentrotus purpuratus Spur01	-	0	5	0	0
Holozoa	08.Holozoa	Tyto alba M040663	-	0	2	0	0
Holozoa	08.Holozoa	Ursus arctos Adak	-	0	3	0	0
Plantae	09.Plantae	Arabidopsis thaliana TAIR101	-	0	7	0	0
Plantae	09.Plantae	Chlamydomonas reinhardtii CC503cw92	-	0	1	0	0
Plantae	09.Plantae	Fragaria vesca subspvesca	-	0	2	0	0
Plantae	09.Plantae	Hordeum vulgare MorexV3	-	0	5	0	0
Plantae	09.Plantae	Macadamia integrifolia HAES741	-	0	5	0	0
Plantae	09.Plantae	Medicago truncatula JemalongA17	-	0	6	0	0
Plantae	09.Plantae	Oryza sativa JaponicaGroup Nipponbare	-	0	6	0	0
Plantae	09.Plantae	Populus trichocarpa Nisqually1	-	0	3	0	0
Plantae	09.Plantae	Sorghum bicolor BTx623	-	0	7	0	0
Plantae	09.Plantae	Sphagnum fallax MN	-	0	2	0	0
Plantae	09.Plantae	Triticum aestivum ChineseSpring	-	0	19	0	0
Plantae	09.Plantae	Vitis vinifera PN40024	-	0	3	0	0
Archaea-Bacteria	10.Archaea-Bacteria	Acidobacterium capsulatum ATCC51196	-	0	0	0	0
Archaea-Bacteria	10.Archaea-Bacteria	Brucella abortus 2308	-	0	5	0	0
Archaea-Bacteria	10.Archaea-Bacteria	Escherichia coli ST540	-	0	1	0	0
Archaea-Bacteria	10.Archaea-Bacteria	Ferroglobus placidus DSM10642	-	0	0	0	0
Archaea-Bacteria	10.Archaea-Bacteria	Fischerella muscicola PCC7414	-	0	1	0	0
Archaea-Bacteria	10.Archaea-Bacteria	Halobacterium salinarum 91R6	-	0	0	0	0
Archaea-Bacteria	10.Archaea-Bacteria	Haloferax volcanii DS2	-	0	0	0	0
Archaea-Bacteria	10.Archaea-Bacteria	Haloquadratum walsbyi DSM16790	-	0	0	0	0
Archaea-Bacteria	10.Archaea-Bacteria	Methanothermobacter thermautotrophicus strDeltaH	-	0	0	0	0
Archaea-Bacteria	10.Archaea-Bacteria	Mycobacterium tuberculosis 0B329XDR	-	0	1	0	0
Archaea-Bacteria	10.Archaea-Bacteria	Nostoc punctiforme PCC73102	-	0	2	0	0
Archaea-Bacteria	10.Archaea-Bacteria	Pseudomonas aeruginosa PSE305	-	0	3	0	0
Archaea-Bacteria	10.Archaea-Bacteria	Spirulina subsalsa PCC9445	-	0	0	0	0
Archaea-Bacteria	10.Archaea-Bacteria	Staphylococcus aureus 502A	-	0	1	0	0
Archaea-Bacteria	10.Archaea-Bacteria	Sulfolobus acidocaldarius DG1	-	0	0	0	0
Archaea-Bacteria	10.Archaea-Bacteria	Thermoplasma acidophilum DSM1728	-	0	0	0	0

## Sheet: Supplementary Table 4
Supplementary Table S4. Number of cysteines in proteins of interest (candidate effectors, CAZymes etc).
Protein	# of Cysteines
Aqui_mc_16_snap_gene_12_8	5
Aqui_mc_7_snap_gene_7_53	4
Aqui_smc_11_processed_gene_27_74	1
Aqui_smc_14_processed_gene_24_167	5
Aqui_smc_21_processed_gene_4_14	6
Aqui_smc_3_processed_gene_27_27	4
Asp3_1912625	0
Asp3_1914570	4
Asp3_1915313	4
Asp3_1916815	6
Asp3_1917606	5
Asp3_1917827	5
Bgra_Bgt-55126	4
Eweb_KOS18854	4
Eweb_KOS20236	4
Lmac_KAH9862243	5
Lmac_KAH9867350	1
Lmac_KAH9869218	6
Pmin_KAF9729245	2
Pmin_KAF9729248	2
Pmin_KAF9730661	1
Pmin_KAF9731251	4
Pmin_KAF9732090	5
Pmin_KAF9733286	5
Pmin_KAF9734270	0
Pmin_KAF9739405	4
Pmin_KAF9740004	2
Pmin_KAF9741142	4
Thar_PTB48460	5
Thar_PTB50866	4
Thar_PTB53012	4
Thar_PTB58093	8
Thar_PTB59986	2

## Sheet: Supplementary Table 5
Supplementary Table S5. Table of the structural homology between the various candidate effector proteins found in Cluster A for A. quisqualis in Fig. 3a. Side A and B refer to the two sides that protein structure was anchored. Species 1 and 2 refer to the species and/or isolate of to which Protein 1 or 2 belongs to respectively. Homology has been found with the B. graminis effector Bgt-3979 (belo…
Protein 1	Protein 2	Side A	Side B	Species 1	Species 2
Amp_Qq_mc_14_sg_13_40_mRNA_1	Bgt-4300	0.92836	0.52104	A. quisqualis	B. graminis
Amp_Qq_mc_14_sg_7_22_mRNA_1	Bgt-4300	0.83996	0.53598	A. quisqualis	B. graminis
Amp_Qq_mc_16_sg_32_34_mRNA_1	Bgt-4300	0.88851	0.50721	A. quisqualis	B. graminis
Amp_Qq_mc_6_sg_25_48_mRNA_1	Bgt-4300	0.65016	0.538	A. quisqualis	B. graminis
Amp_Qq_mc_7_sg_2_157_mRNA_1	Bgt-4300	0.81193	0.56567	A. quisqualis	B. graminis
Amp_Qq_ms_35_sg_17_63_mRNA_1	Bgt-4300	0.65656	0.5394	A. quisqualis	B. graminis
Amp_Qq_smc_16_pg_0_10_mRNA_1	Bgt-4300	0.8496	0.53831	A. quisqualis	B. graminis
Amp_Qq_smc_16_pg_2_33_mRNA_1	Bgt-4300	0.92098	0.54587	A. quisqualis	B. graminis
Amp_Qq_smc_16_pg_20_51_mRNA_1	Bgt-4300	0.72624	0.5447	A. quisqualis	B. graminis
Amp_Qq_smc_22_pg_2_4_mRNA_1	Bgt-4300	0.8163	0.52366	A. quisqualis	B. graminis
Amp_Qq_smc_22_pg_4_18_mRNA_1	Bgt-4300	0.84817	0.53903	A. quisqualis	B. graminis
Amp_Qq_smc_4_pg_17_17_mRNA_1	Bgt-4300	0.81515	0.53775	A. quisqualis	B. graminis
Amp_Qq_mc_14_sg_2_56_mRNA_1	Bgt-3809	0.55254	0.52024	A. quisqualis	B. graminis
Amp_Qq_mc_21_sg_9_86_mRNA_1	Bgt-3809	0.64008	0.60504	A. quisqualis	B. graminis
Amp_Qq_mc_5_sg_13_18_mRNA_1	Bgt-3809	0.67121	0.69938	A. quisqualis	B. graminis
Amp_Qq_mc_14_sg_13_40_mRNA_1	Bgt-3809	0.5079	0.51004	A. quisqualis	B. graminis
Amp_Qq_mc_6_sg_13_68_mRNA_1	Bgt-3979	0.50936	0.62745	A. quisqualis	B. graminis
Amp_Qq_mc_21_sg_9_86_mRNA_1	Bgt-3979	0.71569	0.67216	A. quisqualis	B. graminis
Amp_Qq_mc_5_sg_13_18_mRNA_1	Bgt-3979	0.65395	0.67805	A. quisqualis	B. graminis
Amp_Qq_smc_16_pg_2_33_mRNA_1	Bgt-3979	0.5071	0.53064	A. quisqualis	B. graminis
Amp_Qq_mc_14_sg_13_40_mRNA_1	Bgt-3979	0.52602	0.52602	A. quisqualis	B. graminis
Amp_Qq_mc_14_sg_13_40_mRNA_1	KAF9733349	0.98901	0.90474	A. quisqualis	P. minitans
Amp_Qq_mc_14_sg_13_40_mRNA_1	KAF9737808	0.97785	0.96373	A. quisqualis	P. minitans
Amp_Qq_mc_14_sg_13_40_mRNA_1	KAF9735282	0.94165	0.8912	A. quisqualis	P. minitans
Amp_Qq_mc_14_sg_13_40_mRNA_1	KAF9736449	0.94031	0.82743	A. quisqualis	P. minitans
Amp_Qq_mc_14_sg_13_40_mRNA_1	KAF9734989	0.91295	0.89185	A. quisqualis	P. minitans
Amp_Qq_mc_14_sg_13_40_mRNA_1	KAF9739805	0.90556	0.77319	A. quisqualis	P. minitans
Amp_Qq_mc_14_sg_13_40_mRNA_1	KAF9732217	0.9049	0.89645	A. quisqualis	P. minitans
Amp_Qq_mc_14_sg_13_40_mRNA_1	KAF9736887	0.90445	0.80046	A. quisqualis	P. minitans
Amp_Qq_mc_14_sg_13_40_mRNA_1	KAF9731341	0.90372	0.79916	A. quisqualis	P. minitans
Amp_Qq_mc_14_sg_13_40_mRNA_1	KAF9731075	0.90306	0.51912	A. quisqualis	P. minitans
Amp_Qq_mc_14_sg_13_40_mRNA_1	KAF9728377	0.90214	0.7768	A. quisqualis	P. minitans
Amp_Qq_mc_14_sg_13_40_mRNA_1	KAF9734879	0.90187	0.78925	A. quisqualis	P. minitans
Amp_Qq_mc_14_sg_13_40_mRNA_1	KAF9733935	0.90161	0.79847	A. quisqualis	P. minitans
Amp_Qq_mc_14_sg_13_40_mRNA_1	KAF9732438	0.89925	0.83351	A. quisqualis	P. minitans
Amp_Qq_mc_14_sg_13_40_mRNA_1	KAF9735193	0.89281	0.81978	A. quisqualis	P. minitans
Amp_Qq_mc_14_sg_13_40_mRNA_1	KAF9732280	0.88938	0.84607	A. quisqualis	P. minitans
Amp_Qq_mc_14_sg_13_40_mRNA_1	KAF9735182	0.84895	0.54704	A. quisqualis	P. minitans
Amp_Qq_mc_14_sg_13_40_mRNA_1	KAF9736667	0.52947	0.56356	A. quisqualis	P. minitans
Amp_Qq_mc_14_sg_13_40_mRNA_1	KAF9739688	0.52531	0.61736	A. quisqualis	P. minitans
Amp_Qq_mc_21_sg_9_86_mRNA_1	LGSR01_KOS17891	0.62025	0.50988	A. quisqualis	E. weberi
Amp_Qq_mc_5_sg_13_18_mRNA_1	LGSR01_KOS17891	0.7113	0.644	A. quisqualis	E. weberi
Amp_Qq_mc_6_sg_13_68_mRNA_1	LGSR01_KOS17891	0.50404	0.54286	A. quisqualis	E. weberi
Amp_Qq_mc_14_sg_13_40_mRNA_1	KAF1917020	0.52994	0.52994	A. quisqualis	A. sp3
Amp_Qq_mc_14_sg_13_40_mRNA_1	KAF1918601	0.54372	0.56027	A. quisqualis	A. sp3
Amp_Qq_mc_14_sg_13_40_mRNA_1	KAF1911635	0.84543	0.86984	A. quisqualis	A. sp3
Amp_Qq_mc_14_sg_13_40_mRNA_1	KAF1920548	0.84722	0.57913	A. quisqualis	A. sp3
Amp_Qq_mc_14_sg_13_40_mRNA_1	KAF1913739	0.87121	0.86314	A. quisqualis	A. sp3
Amp_Qq_mc_14_sg_13_40_mRNA_1	KAF1921535	0.88436	0.79047	A. quisqualis	A. sp3
Amp_Qq_mc_14_sg_13_40_mRNA_1	KAF1918165	0.88933	0.84604	A. quisqualis	A. sp3
Amp_Qq_mc_14_sg_13_40_mRNA_1	KAF1918266	0.88958	0.7952	A. quisqualis	A. sp3
Amp_Qq_mc_14_sg_13_40_mRNA_1	KAF1914694	0.88976	0.7669	A. quisqualis	A. sp3
Amp_Qq_mc_14_sg_13_40_mRNA_1	KAF1921603	0.89044	0.75941	A. quisqualis	A. sp3
Amp_Qq_mc_14_sg_13_40_mRNA_1	KAF1917469	0.89567	0.79286	A. quisqualis	A. sp3
Amp_Qq_mc_14_sg_13_40_mRNA_1	KAF1917668	0.90609	0.68753	A. quisqualis	A. sp3
Amp_Qq_mc_14_sg_13_40_mRNA_1	KAF1915909	0.9098	0.80472	A. quisqualis	A. sp3
Amp_Qq_mc_14_sg_13_40_mRNA_1	KAF1913288	0.91713	0.79166	A. quisqualis	A. sp3
Amp_Qq_mc_14_sg_13_40_mRNA_1	KAF1913851	0.93071	0.90097	A. quisqualis	A. sp3
Amp_Qq_mc_14_sg_13_40_mRNA_1	KAF1918900	0.93077	0.87343	A. quisqualis	A. sp3
Amp_Qq_mc_14_sg_13_40_mRNA_1	KAF1921516	0.94128	0.81099	A. quisqualis	A. sp3
Amp_Qq_mc_14_sg_13_40_mRNA_1	KAF1916072	0.99942	0.99942	A. quisqualis	A. sp3
Amp_Qq_mc_14_sg_13_40_mRNA_1	PTB47703	0.90406	0.80072	A. quisqualis	T. harzianum CBS 226.95
Amp_Qq_mc_14_sg_13_40_mRNA_1	PTB61030	0.65619	0.61993	A. quisqualis	T. harzianum CBS 226.95
Amp_Qq_mc_14_sg_13_40_mRNA_1	PTB58128	0.63944	0.51491	A. quisqualis	T. harzianum CBS 226.95
Amp_Qq_mc_14_sg_13_40_mRNA_1	PTB48069	0.51109	0.54307	A. quisqualis	T. harzianum CBS 226.95
Amp_Qq_mc_14_sg_13_40_mRNA_1	KAH9859348	0.90797	0.80274	A. quisqualis	P. lingam CAN1
Amp_Qq_mc_14_sg_13_40_mRNA_1	KAH9860290	0.90651	0.68765	A. quisqualis	P. lingam CAN1
Amp_Qq_mc_14_sg_13_40_mRNA_1	KAH9862029	0.91257	0.81326	A. quisqualis	P. lingam CAN1
Amp_Qq_mc_14_sg_13_40_mRNA_1	KAH9862149	0.84807	0.57703	A. quisqualis	P. lingam CAN1
Amp_Qq_mc_14_sg_13_40_mRNA_1	KAH9865165	0.52046	0.52494	A. quisqualis	P. lingam CAN1
Amp_Qq_mc_14_sg_13_40_mRNA_1	KAH9865289	0.91328	0.53232	A. quisqualis	P. lingam CAN1
Amp_Qq_mc_14_sg_13_40_mRNA_1	KAH9867507	0.86373	0.84419	A. quisqualis	P. lingam CAN1
Amp_Qq_mc_14_sg_13_40_mRNA_1	KAH9869362	0.91096	0.80568	A. quisqualis	P. lingam CAN1
Amp_Qq_mc_14_sg_13_40_mRNA_1	KAH9869618	0.99281	0.98795	A. quisqualis	P. lingam CAN1
Amp_Qq_mc_14_sg_13_40_mRNA_1	KAH9871404	0.94727	0.81906	A. quisqualis	P. lingam CAN1
Amp_Qq_mc_14_sg_13_40_mRNA_1	KAH9871475	0.90096	0.83141	A. quisqualis	P. lingam CAN1
Cluster B = E064
Cluster C = E156

## Sheet: Supplementary Table 6
Supplementary Table S6. All the proteins grouping in Cluster A of A. quisqualis in Fig. 3a for various fungi. Homology with CAZymes using dbCAN. The three methods (HMMER, dbCAN_sub, and DIAMOND) find homology with any CAZyme in the database, while SignalP recognises the proteins with a signal peptide.
Cluster A = E139/GH/AA9		Auxiliary Activity Family 9
Protein ID	Species	EC#	HMMER	dbCAN_sub	DIAMOND	SignalP	#ofTools
Aqui_mc_14_snap_gene_13_40	A. quisqualis	1.14.99.54	AA9(9-208)	AA9_e36	AA9	N	3
Aqui_mc_14_snap_gene_2_56	A. quisqualis	-	AA16(18-190)	AA16_e2	N	N	2
Aqui_mc_14_snap_gene_7_22	A. quisqualis	1.14.99.54|1.14.99.56	AA9(5-232)	AA9_e14	AA9	Y(1-19)	3
Aqui_mc_16_snap_gene_32_34	A. quisqualis	1.14.99.56|1.14.99.54	AA9(6-199)	AA9_e31	N	Y(1-18)	2
Aqui_mc_6_snap_gene_25_48	A. quisqualis	1.14.99.56	AA9(6-219)	AA9_e2	AA9+CBM1	Y(1-21)	3
Aqui_mc_7_snap_gene_2_157	A. quisqualis	1.14.99.54|1.14.99.56	AA9(10-258)	AA9_e13	AA9	Y(1-20)	3
Aqui_smc_16_processed_gene_0_10	A. quisqualis	-	AA9(10-229)	AA9_e26	AA9	N	3
Aqui_smc_16_processed_gene_20_51	A. quisqualis	1.14.99.54|1.14.99.56	AA9(9-255)	AA9_e15	AA9	N	3
Aqui_smc_16_processed_gene_2_33	A. quisqualis	-	AA9(6-214)	AA9_e3	AA9	Y(1-32)	3
Aqui_smc_22_processed_gene_2_4	A. quisqualis	-	AA9(6-218)	AA9_e26	N	N	2
Aqui_smc_22_processed_gene_4_18	A. quisqualis	-	AA9(10-232)	AA9_e28	AA9	Y(1-23)	3
Aqui_smc_4_processed_gene_17_17	A. quisqualis	-	AA9(5-227)	AA9_e28	AA9	N	3
KAF1911635	A. sp3	1.14.99.54	AA9(5-195)	AA9_e33	N	N	2
KAF1913288	A. sp3	1.14.99.54	AA9(7-224)	AA9_e16	AA9+CBM1	Y(1-22)	3
KAF1913739	A. sp3	1.14.99.54|1.14.99.56	AA9(12-208)	AA9_e7	N	Y(1-19)	2
KAF1913851	A. sp3	1.14.99.54|1.14.99.56	AA9(6-211)	AA9_e7	AA9	Y(1-18)	3
KAF1914694	A. sp3	-	AA9(5-227)	AA9_e28	AA9	N	3
KAF1915909	A. sp3	1.14.99.54|1.14.99.56	AA9(5-232)	AA9_e14	AA9	Y(1-19)	3
KAF1916072	A. sp3	1.14.99.54	AA9(9-208)	AA9_e36	AA9	Y(1-21)	3
KAF1917469	A. sp3	1.14.99.56|1.14.99.54	AA9(7-225)	AA9_e31	N	Y(1-18)	2
KAF1917668	A. sp3	1.14.99.54|1.14.99.56	AA9(9-255)	AA9_e15	AA9	N	3
KAF1918165	A. sp3	-	AA9(6-214)	AA9_e3	AA9	N	3
KAF1918266	A. sp3	-	AA9(10-229)	AA9_e26	AA9	N	3
KAF1918900	A. sp3	-	AA9(8-218)	AA9_e47	N	Y(1-19)	2
KAF1920548	A. sp3	1.14.99.56	AA9(5-217)	AA9_e2	AA9+CBM1	Y(1-19)	3
KAF1921516	A. sp3	1.14.99.54	AA9(9-219)	AA9_e36	AA9	Y(1-21)	3
KAF1921535	A. sp3	-	AA9(9-232)	AA9_e28	AA9	Y(1-23)	3
KAF1921603	A. sp3	-	AA9(6-227)	AA9_e26	N	N	2
Bgt-4300	B. graminis	-	AA9(9-231)	AA9_e11	AA9	Y(1-18)	3
KAH9859348	Pl. lingam	1.14.99.54|1.14.99.56	AA9(9-226)	AA9_e13	AA9	N	3
KAH9860290	Pl. lingam	1.14.99.54|1.14.99.56	AA9(9-255)	AA9_e15	AA9	Y(1-30)	3
KAH9862029	Pl. lingam	1.14.99.56|1.14.99.54	AA9(5-222)	AA9_e31	AA9	Y(1-21)	3
KAH9862149	Pl. lingam	1.14.99.56	AA9(10-221)	AA9_e2	AA9+CBM1	Y(1-21)	3
KAH9865289	Pl. lingam	-	AA9(6-211)	AA9_e41	AA9+CBM1	N	3
KAH9867507	Pl. lingam	-	AA9(6-208)	AA9_e3	AA9	N	3
KAH9869362	Pl. lingam	1.14.99.54|1.14.99.56	AA9(5-233)	AA9_e14	AA9	N	3
KAH9869618	Pl. lingam	1.14.99.54	AA9(10-209)	AA9_e36	AA9	Y(1-21)	3
KAH9871404	Pl. lingam	1.14.99.54	AA9(8-217)	AA9_e36	AA9	N	3
KAH9871475	Pl. lingam	1.14.99.54	AA9(20-236)	AA9_e16	AA9	Y(1-23)	3
KAF9728377	P. minitans	-	AA9(6-228)	AA9_e28	N	Y(1-26)	2
KAF9731075	P. minitans	-	AA9(7-209)	AA9_e41	AA9	N	3
KAF9731341	P. minitans	1.14.99.56|1.14.99.54	AA9(8-226)	AA9_e31	N	Y(1-23)	2
KAF9732217	P. minitans	1.14.99.54|1.14.99.56	AA9(5-204)	AA9_e6	N	Y(1-26)	2
KAF9732280	P. minitans	-	AA9(5-214)	AA9_e3	AA9	Y(1-19)	3
KAF9732438	P. minitans	1.14.99.54	AA9(7-222)	AA9_e16	AA9	Y(1-20)	3
KAF9733349	P. minitans	1.14.99.54	AA9(10-226)	AA9_e36	N	N	2
KAF9733935	P. minitans	-	AA9(5-231)	AA9_e29	N	Y(1-24)	2
KAF9734879	P. minitans	-	AA9(8-236)	AA9_e28	AA9	Y(1-22)	3
KAF9734989	P. minitans	1.14.99.54|1.14.99.56	AA9(21-217)	AA9_e7	N	Y(1-37)	2
KAF9735182	P. minitans	-	AA9(7-228)	AA9_e44	N	Y(1-34)	2
KAF9735193	P. minitans	1.14.99.56	AA9(7-224)	AA9_e23	N	Y(1-19)	2
KAF9735282	P. minitans	1.14.99.54|1.14.99.56	AA9(6-214)	AA9_e7	N	Y(1-24)	2
KAF9736449	P. minitans	-	AA9(9-222)	AA9_e1	N	Y(1-21)	2
KAF9736667	P. minitans	-	AA16(18-190)	AA16_e2	N	Y(1-29)	2
KAF9736887	P. minitans	1.14.99.54|1.14.99.56	AA9(8-232)	AA9_e14	AA9	N	3
KAF9737808	P. minitans	1.14.99.54	AA9(12-210)	AA9_e36	N	N	2
KAF9739688	P. minitans	-	AA16(19-182)	AA16_e0	N	Y(1-19)	2
KAF9739805	P. minitans	1.14.99.54	AA9(8-233)	AA9_e25	N	Y(1-19)	2
PTB47703	T. harzianum	-	AA9(7-233)	AA9_e29	AA9	Y(1-19)	3
PTB58128	T. harzianum	-	AA14(24-286)	AA14_e0	AA14	Y(1-27)	3
PTB61030	T. harzianum	-	AA11(37-211)	AA11_e8	AA11	Y(1-19)	3

## Sheet: Supplementary Table 7
Supplementary Table S7. Table of the structural homology between the various candidate effector proteins found in Cluster B for A. quisqualis in Fig. 3a. Side A and B refer to the two sides that protein structure was anchored. Species 1 and 2 refer to the species and/or isolate of to which Protein 1 or 2 belongs to respectively. Homology has been found with the B. graminis effector Bgt-55126 (bel…
Protein 1	Protein 2	Side A	Side B	Species 1	Species 2
Amp_Qq_smc_14_pg_24_167_mRNA_1	Bgt-55126	0.80796	0.85098	A. quisqualis	B. graminis
Amp_Qq_smc_21_pg_4_14_mRNA_1	Bgt-55126	0.68245	0.74185	A. quisqualis	B. graminis
Amp_Qq_smc_11_pg_27_74_mRNA_1	Bgt-55126	0.57659	0.60144	A. quisqualis	B. graminis
Amp_Qq_mc_16_sg_12_8_mRNA_1	Bgt-55126	0.57257	0.56972	A. quisqualis	B. graminis
Amp_Qq_smc_3_pg_27_27_mRNA_1	Bgt-55126	0.55022	0.55556	A. quisqualis	B. graminis
Amp_Qq_mc_7_sg_7_53_mRNA_1	Bgt-55126	0.54526	0.50401	A. quisqualis	B. graminis
Amp_Qq_smc_14_pg_24_167_mRNA_1	KAF9733286	0.84468	0.92652	A. quisqualis	P. minitans
Amp_Qq_smc_14_pg_24_167_mRNA_1	KAF9731251	0.70135	0.76844	A. quisqualis	P. minitans
Amp_Qq_smc_14_pg_24_167_mRNA_1	KAF9734270	0.59208	0.62136	A. quisqualis	P. minitans
Amp_Qq_smc_14_pg_24_167_mRNA_1	KAF9730661	0.58336	0.63757	A. quisqualis	P. minitans
Amp_Qq_smc_14_pg_24_167_mRNA_1	KAF9739405	0.55916	0.59183	A. quisqualis	P. minitans
Amp_Qq_smc_14_pg_24_167_mRNA_1	KAF9741142	0.55638	0.55127	A. quisqualis	P. minitans
Amp_Qq_smc_14_pg_24_167_mRNA_1	KAF9729248	0.55344	0.5412	A. quisqualis	P. minitans
Amp_Qq_smc_14_pg_24_167_mRNA_1	KAF9729245	0.55018	0.55018	A. quisqualis	P. minitans
Amp_Qq_smc_14_pg_24_167_mRNA_1	KAF9732090	0.54562	0.53814	A. quisqualis	P. minitans
Amp_Qq_smc_14_pg_24_167_mRNA_1	KAF9740004	0.50868	0.58155	A. quisqualis	P. minitans
Amp_Qq_mc_16_sg_12_8_mRNA_1	LGSR01_KOS18854	0.66904	0.52302	A. quisqualis	E. weberi
Amp_Qq_mc_16_sg_12_8_mRNA_1	LGSR01_KOS20236	0.65087	0.56321	A. quisqualis	E. weberi
Amp_Qq_smc_21_pg_4_14_mRNA_1	LGSR01_KOS20236	0.62361	0.58867	A. quisqualis	E. weberi
Amp_Qq_smc_3_pg_27_27_mRNA_1	LGSR01_KOS20236	0.6185	0.54477	A. quisqualis	E. weberi
Amp_Qq_smc_14_pg_24_167_mRNA_1	LGSR01_KOS20236	0.60101	0.54996	A. quisqualis	E. weberi
Amp_Qq_smc_21_pg_4_14_mRNA_1	LGSR01_KOS18854	0.59728	0.51165	A. quisqualis	E. weberi
Amp_Qq_smc_11_pg_27_74_mRNA_1	LGSR01_KOS20236	0.58742	0.5353	A. quisqualis	E. weberi
Amp_Qq_smc_14_pg_24_167_mRNA_1	KAF1916815	0.70724	0.68409	A. quisqualis	A. sp3
Amp_Qq_smc_14_pg_24_167_mRNA_1	KAF1915313	0.68037	0.69714	A. quisqualis	A. sp3
Amp_Qq_smc_14_pg_24_167_mRNA_1	KAF1914570	0.62146	0.56734	A. quisqualis	A. sp3
Amp_Qq_smc_14_pg_24_167_mRNA_1	KAF1917606	0.62018	0.62018	A. quisqualis	A. sp3
Amp_Qq_smc_14_pg_24_167_mRNA_1	KAF1912625	0.56258	0.61962	A. quisqualis	A. sp3
Amp_Qq_smc_14_pg_24_167_mRNA_1	KAF1917827	0.54781	0.54528	A. quisqualis	A. sp3
Amp_Qq_smc_14_pg_24_167_mRNA_1	PTB50866	0.7844	0.82101	A. quisqualis	T. harzianum CBS 226.95
Amp_Qq_smc_14_pg_24_167_mRNA_1	PTB48460	0.72833	0.80292	A. quisqualis	T. harzianum CBS 226.95
Amp_Qq_smc_14_pg_24_167_mRNA_1	PTB59986	0.59742	0.59191	A. quisqualis	T. harzianum CBS 226.95
Amp_Qq_smc_14_pg_24_167_mRNA_1	PTB53012	0.58956	0.5788	A. quisqualis	T. harzianum CBS 226.95
Amp_Qq_smc_14_pg_24_167_mRNA_1	PTB58093	0.56817	0.69936	A. quisqualis	T. harzianum CBS 226.95
KAH9869218	Bgt-55126	0.73806	0.8384	P. lingam CAN1	B. graminis
KAH9867350	Bgt-55126	0.66755	0.62777	P. lingam CAN1	B. graminis
KAH9862243	Bgt-55126	0.65979	0.70638	P. lingam CAN1	B. graminis
PTB59986	LGSR01_KOS18854	0.63318	0.52814	T. harzianum CBS 226.95	E. weberi
PTB59986	LGSR01_KOS20236	0.79783	0.73291	T. harzianum CBS 226.95	E. weberi
PTB58093	LGSR01_KOS20236	0.71786	0.53347	T. harzianum CBS 226.95	E. weberi
PTB53012	LGSR01_KOS18854	0.63428	0.53593	T. harzianum CBS 226.95	E. weberi
PTB53012	LGSR01_KOS20236	0.85441	0.79166	T. harzianum CBS 226.95	E. weberi
PTB50866	LGSR01_KOS20236	0.60658	0.53346	T. harzianum CBS 226.95	E. weberi
PTB48460	LGSR01_KOS20236	0.68622	0.56983	T. harzianum CBS 226.95	E. weberi

## Sheet: Supplementary Table 8
Supplementary Table S8. Table of the structural homology between the various candidate effector proteins found in Cluster C for A. quisqualis in Fig. 3a. Side A and B refer to the two sides that protein structure was anchored. Species 1 and 2 refer to the species and/or isolate of to which Protein 1 or 2 belongs to respectively. Homology has been found with the B. graminis effector Bgt-178 (belon…
Protein 1	Protein 2	Side A	Side B	Species 1	Species 2
Amp_Qq_mc_6_sg_26_80_mRNA_1	Bgt-178	0.74539	0.54969	A. quisqualis	B. graminis
Amp_Qq_mc_4_sg_21_160_mRNA_1	Bgt-178	0.5774	0.56324	A. quisqualis	B. graminis
Amp_Qq_mc_3_sg_1_71_mRNA_1	Bgt-178	0.52256	0.51624	A. quisqualis	B. graminis
Amp_Qq_mc_6_sg_26_80_mRNA_1	KAF9731560	0.68944	0.85402	A. quisqualis	P. minitans
Amp_Qq_mc_6_sg_26_80_mRNA_1	Pmin_KAF9730523	0.74626	0.63021	A. quisqualis	P. minitans
Amp_Qq_mc_6_sg_26_80_mRNA_1	Pmin_KAF9732770	0.80288	0.62168	A. quisqualis	P. minitans
Amp_Qq_mc_6_sg_26_80_mRNA_1	Pmin_KAF9738722	0.74702	0.61576	A. quisqualis	P. minitans
Amp_Qq_mc_6_sg_26_80_mRNA_1	Pmin_KAF9732713	0.74358	0.61571	A. quisqualis	P. minitans
Amp_Qq_mc_6_sg_26_80_mRNA_1	Pmin_KAF9738597	0.68744	0.51737	A. quisqualis	P. minitans
Amp_Qq_mc_3_sg_1_71_mRNA_1	LGSR01_KOS19883	0.5232	0.64675	A. quisqualis	E. weberi
Amp_Qq_mc_3_sg_1_71_mRNA_1	LGSR01_KOS22016	0.52609	0.48707	A. quisqualis	E. weberi
Amp_Qq_mc_3_sg_1_71_mRNA_1	LGSR01_KOS22128	0.56759	0.40369	A. quisqualis	E. weberi
Amp_Qq_mc_6_sg_26_80_mRNA_1	KAF1920591	0.91457	0.97638	A. quisqualis	A. sp3
Amp_Qq_mc_6_sg_26_80_mRNA_1	KAF1917326	0.77298	0.73575	A. quisqualis	A. sp3
Amp_Qq_mc_6_sg_26_80_mRNA_1	KAF1921678	0.72279	0.5414	A. quisqualis	A. sp3
Amp_Qq_mc_6_sg_26_80_mRNA_1	PTB49804	0.82061	0.8492	A. quisqualis	T. harzianum CBS 226.95
Amp_Qq_mc_6_sg_26_80_mRNA_1	PTB55724	0.81314	0.69366	A. quisqualis	T. harzianum CBS 226.95
Amp_Qq_mc_6_sg_26_80_mRNA_1	PTB57588	0.80458	0.73799	A. quisqualis	T. harzianum CBS 226.95
Amp_Qq_mc_6_sg_26_80_mRNA_1	PTB49813	0.78423	0.67367	A. quisqualis	T. harzianum CBS 226.95
Amp_Qq_mc_6_sg_26_80_mRNA_1	PTB61075	0.76555	0.64516	A. quisqualis	T. harzianum CBS 226.95
KAH9867895	Bgt-178	0.72372	0.59004	Plenodomus lingam CAN1	B. graminis
KAH9881361	Bgt-178	0.53528	0.51358	Plenodomus lingam CAN1	B. graminis
PTB49804	LGSR01_KOS22016	0.8008	0.53639	T. harzianum CBS 226.95	E. weberi
PTB57588	LGSR01_KOS22016	0.6848	0.51238	T. harzianum CBS 226.95	E. weberi
PTB55724	LGSR01_KOS22016	0.65264	0.52565	T. harzianum CBS 226.95	E. weberi
PTB49813	LGSR01_KOS22016	0.65193	0.51942	T. harzianum CBS 226.95	E. weberi
PTB61075	LGSR01_KOS22016	0.62478	0.50964	T. harzianum CBS 226.95	E. weberi
PTB49804	LGSR01_KOS19883	0.87824	0.78305	T. harzianum CBS 226.95	E. weberi
PTB57588	LGSR01_KOS19883	0.72347	0.72724	T. harzianum CBS 226.95	E. weberi
PTB55724	LGSR01_KOS19883	0.67343	0.72871	T. harzianum CBS 226.95	E. weberi
PTB49813	LGSR01_KOS19883	0.67168	0.72029	T. harzianum CBS 226.95	E. weberi
PTB61075	LGSR01_KOS19883	0.6443	0.70402	T. harzianum CBS 226.95	E. weberi

## Sheet: Supplementary Table 9
Supplementary Table S9. All the proteins grouping in Cluster X of A. quisqualis in Fig. 3a for A. quisqualis. Homology with CAZymes using dbCAN. The three methods (HMMER, dbCAN_sub, and DIAMOND) find homology with any CAZyme in the database, while SignalP recognises the proteins with a signal peptide.
Protein ID	EC#	HMMER	dbCAN_sub	DIAMOND	Signalp	#ofTools
mc_22_sg_23_96	4.2.2.2	PL3_2(45-230)	PL3_e16	PL3_2	N	3
mc_3_sg_9_52	4.2.2.10	PL1_4(114-298)	PL1_e16	PL1_4	Y(1-19)	3
mc_4_sg_37_175	3.2.1.15	GH28(41-359)	GH28_e75	GH28	Y(1-38)	3
mc_6_sg_12_74	4.2.2.2	PL1_7(82-262)	PL1_e18	PL1_7	Y(1-18)	3
mc_7_sg_13_43	3.2.1.67|3.2.1.-	GH28(79-428)	GH28_e58	GH28	Y(1-22)	3
mc_7_sg_5_41	3.2.1.15|3.1.1.11	GH28(52-373)	GH28_e56	GH28	Y(1-24)	3
smc_14_pg_33_8	-	PL3_2(32-216)	PL3_e11	CBM1+PL3_2	Y(1-19)	3
smc_18_pg_8_0	-	PL1_4(110-296)	PL1_e40	CBM1+PL1_4	N	3
smc_22_pg_24_85	4.2.2.2	PL3_2(59-243)	PL3_e16	PL3_2	Y(1-19)	3
smc_22_pg_27_13	-	PL9_3(19-377)	PL9_e35	PL9_3	Y(1-20)	3
smc_23_pg_17_129	-	PL1_9(71-237)	PL1_e27	PL1_9	Y(1-19)	3
smc_3_pg_2_11	-	PL1_10(79-252)	PL1_e31	PL1_10	Y(1-23)	3
mc_7_sg_13_34	N	N	N	CBM1	Y(1-20)	1

## Sheet: Supplementary Table 10
Supplementary Table S10. Table of the structural homology for the rest of the candidate effector proteins not in the four clusters of A. quisqualis in Fig. 3a. Side A and B refer to the score of the two sides that protein structure was anchored. Species 1 and 2 refer to the species and/or isolate of to which Protein 1 or 2 belongs to respectively.
Protein 1	Protein 2	Side A	Side B	Species 1	Species 2	Effector family in B. graminis	Group
smc_22_pg_21_31_mRNA_1	Bgt-55100	0.63606	0.686	A. quisqualis	B. graminis	E004 (many)	A
KAH9877382	Bgt-55100	0.66283	0.89254	Pl. lingam	B. graminis	E004 (many)	A
KAH9881368	Bgt-55100	0.64209	0.78823	Pl. lingam	B. graminis	E004 (many)	A
mc_20_sg_20_3_mRNA_1	Bgt-55117	0.61661	0.53233	A. quisqualis	B. graminis	E016 (many)	C
mc_20_sg_20_3_mRNA_1	Bgt-55000	0.73463	0.5201	A. quisqualis	B. graminis	E017 (many)	C
mc_20_sg_20_3_mRNA_1	Bgt-55008	0.61966	0.72299	A. quisqualis	B. graminis	E017 (many)	C
mc_20_sg_20_3_mRNA_1	Bgt-55043	0.69897	0.6934	A. quisqualis	B. graminis	E017 (many)	C
mc_20_sg_20_3_mRNA_1	Bgt-55114	0.76386	0.55323	A. quisqualis	B. graminis	E017 (many)	C
smc_22_pg_21_31_mRNA_1	Bgt-55114	0.55844	0.67702	A. quisqualis	B. graminis	E017 (many)	C
sms_35_pg_13_30_mRNA_1	Bgt-55135	0.69794	0.6572	A. quisqualis	B. graminis	E024 (many)	A
KAH9876991	Bgt-55135	0.55937	0.64277	Pl. lingam	B. graminis	E024 (many)	A
sms_35_pg_13_30_mRNA_1	Bgt-55136	0.69768	0.65737	A. quisqualis	B. graminis	E024 (many)	A
KAH9876991	Bgt-55136	0.5608	0.64225	Pl. lingam	B. graminis	E024 (many)	A
sms_35_pg_13_30_mRNA_1	Bgt-55138	0.70815	0.66313	A. quisqualis	B. graminis	E024 (many)	A
KAH9876991	Bgt-55138	0.56813	0.65167	Pl. lingam	B. graminis	E024 (many)	A
sms_35_pg_13_30_mRNA_1	BgtE-10002	0.72553	0.72132	A. quisqualis	B. graminis	E024 (many)	A
KAH9876991	BgtE-10002	0.58319	0.71287	Pl. lingam	B. graminis	E024 (many)	A
sms_35_pg_13_30_mRNA_1	BgtE-10005	0.67051	0.6633	A. quisqualis	B. graminis	E024 (many)	A
KAH9876991	BgtE-10005	0.54438	0.65459	Pl. lingam	B. graminis	E024 (many)	A
sms_35_pg_13_30_mRNA_1	BgtE-5709	0.72392	0.64713	A. quisqualis	B. graminis	E024 (many)	A
KAH9876991	BgtE-5709	0.59663	0.65262	Pl. lingam	B. graminis	E024 (many)	A
sms_35_pg_13_30_mRNA_1	BgtE-5710	0.71973	0.64391	A. quisqualis	B. graminis	E024 (many)	A
KAH9876991	BgtE-5710	0.59074	0.64502	Pl. lingam	B. graminis	E024 (many)	A
smc_22_pg_21_31_mRNA_1	BgtE-5563	0.57986	0.51379	A. quisqualis	B. graminis	E028 (many)	C
mc_21_sg_11_61_mRNA_1	Bgt-851	0.73913	0.70125	A. quisqualis	B. graminis	E070	B
mc_5_sg_1_15_mRNA_1	Bgt-851	0.58295	0.74045	A. quisqualis	B. graminis	E070	B
mc_6_sg_13_96_mRNA_1	Bgt-851	0.54453	0.59369	A. quisqualis	B. graminis	E070	B
KAH9865263	Bgt-851	0.72245	0.70698	Pl. lingam	B. graminis	E070	B
KAH9867270	Bgt-851	0.81808	0.85079	Pl. lingam	B. graminis	E070	B
mc_20_sg_20_3_mRNA_1	BgtTE-56000	0.54557	0.64686	A. quisqualis	B. graminis	E090	C
ms_35_sg_19_59_mRNA_1	Bgt-1209	0.75586	0.72677	A. quisqualis	B. graminis	E098	A
KAH9876828	Bgt-1209	0.7445	0.72858	Pl. lingam	B. graminis	E098	A
mc_7_sg_14_108_mRNA_1	Bgt-1257	0.5638	0.61828	A. quisqualis	B. graminis	E099	C
smc_23_pg_6_22_mRNA_1	Bgt-1257	0.61739	0.65294	A. quisqualis	B. graminis	E099	C
mc_4_sg_37_175_mRNA_1	Bgt-1611	0.54976	0.50127	A. quisqualis	B. graminis	E105	A
mc_7_sg_13_34_mRNA_1	Bgt-1611	0.59525	0.53745	A. quisqualis	B. graminis	E105	A
mc_7_sg_5_41_mRNA_1	Bgt-1611	0.52436	0.50205	A. quisqualis	B. graminis	E105	A
smc_22_pg_27_13_mRNA_1	Bgt-1611	0.56158	0.55184	A. quisqualis	B. graminis	E105	A
KAH9859690	Bgt-1611	0.55353	0.50341	Pl. lingam	B. graminis	E105	A
KAH9860885	Bgt-1611	0.59338	0.53646	Pl. lingam	B. graminis	E105	A
KAH9877485	Bgt-1611	0.55697	0.51719	Pl. lingam	B. graminis	E105	A
KAH9878390	Bgt-1611	0.56808	0.51745	Pl. lingam	B. graminis	E105	A
mc_16_sg_7_29_mRNA_1	Bgt-3472	0.81535	0.89482	A. quisqualis	B. graminis	E129	A
KAH9868024	Bgt-3472	0.51126	0.55332	Pl. lingam	B. graminis	E129	A
mc_3_sg_1_71_mRNA_1	Bgt-178	0.52256	0.51624	A. quisqualis	B. graminis	E156	B
mc_4_sg_21_160_mRNA_1	Bgt-178	0.5774	0.56324	A. quisqualis	B. graminis	E156	B
mc_6_sg_26_80_mRNA_1	Bgt-178	0.74539	0.54969	A. quisqualis	B. graminis	E156	B
KAH9867895	Bgt-178	0.72372	0.59004	Pl. lingam	B. graminis	E156	B
KAH9881361	Bgt-178	0.53528	0.51358	Pl. lingam	B. graminis	E156	B
mc_3_sg_13_100_mRNA_1	Bgt-553	0.79242	0.79242	A. quisqualis	B. graminis	E159	C
sms_35_pg_13_30_mRNA_1	BgtASP-21338	0.92201	0.94619	A. quisqualis	B. graminis	E176	A
KAH9876991	BgtASP-21338	0.7156	0.92621	Pl. lingam	B. graminis	E176	A
mc_20_sg_20_3_mRNA_1	Bgt-5608	0.73154	0.53895	A. quisqualis	B. graminis	E217	C
mc_20_sg_20_3_mRNA_1	BgtTE-56087	0.5912	0.7323	A. quisqualis	B. graminis	TE	C

[truncated: 1 more sheets: Supplementary Table 11]
